# Imbalanced amplification: A mechanism of amplification and suppression from local imbalance of excitation and inhibition in cortical circuits

Christopher Ebsch<sup>1</sup> and Robert Rosenbaum<sup>\*,1,2</sup>

1: Department of Applied and Computational Mathematics and Statistics, University of Notre Dame, Notre Dame, Indiana, USA.

2: Interdisciplinary Center for Network Science and Applications, University of Notre Dame, Notre Dame, Indiana, USA.

\*: Corresponding author (Robert.Rosenbaum@nd.edu).

## Abstract

Understanding the relationship between external stimuli and the spiking activity of cortical populations is a central problem in neuroscience. Dense recurrent connectivity in local cortical circuits can lead to counterintuitive response properties, raising the question of whether there are simple arithmetical rules for relating circuits' connectivity structure to their response properties. One such arithmetic is provided by the mean field theory of balanced networks, which is derived in a limit where excitatory and inhibitory synaptic currents precisely balance on average. However, balanced network theory is not applicable to some biologically relevant connectivity structures. We show that cortical circuits with such structure are susceptible to an amplification mechanism arising when excitatory-inhibitory balance is broken at the level of local subpopulations, but maintained at a global level. This amplification, which can be quantified by a linear correction to the classical mean field theory of balanced networks, explains several response properties observed in cortical recordings.

## 1 Introduction

Information about a sensory stimulus is passed along a hierarchy of neural populations, from subcortical areas to the cerebral cortex where it propagates through multiple cortical areas and layers. Within each layer, lateral synaptic connectivity shapes the response to synaptic input from upstream layers and populations. In a similar manner, lateral connectivity shapes the response of cortical populations to artificial, optogenetic stimuli. The densely recurrent structure of local cortical circuits can lead to counter-intuitive response properties [57, 41, 2, 43, 10], making it difficult to predict or interpret a population's response to natural or artificial stimuli. This raises the question of whether there are underlying arithmetic principles through which one can understand the relationship between a local circuit's connectivity structure and its response properties.

In principle this relationship could be deduced from detailed computer simulations of the neurons and synapses that comprise the circuit. In practice, such detailed simulations can be computationally expensive, depend on a large number of unconstrained physiological parameters, and their complexity can make it difficult to pinpoint mechanisms underlying observed

38 phenomena. In many cases, however, one is not interested in how the response of each neuron is  
39 related to the detailed connectivity between every pair of neurons. Relevant questions are often  
40 more macroscopic in nature, *e.g.* “How does increased excitation to population A affect the  
41 average firing rate of neurons in population B?” For such questions, it is sufficient to establish a  
42 relationship between macroscopic connectivity structure and macroscopic response properties.

43 One such approach is provided by the mean-field theory of balanced networks [58, 59, 48,  
44 45, 30], which is derived in the limit of a large number of neurons and a resulting precise  
45 balance of strong excitation with strong inhibition. This notion of precise balance implies a  
46 simple relationship between the macroscopic structure of connectivity and firing rates, and  
47 balanced network models naturally produce the asynchronous, irregular spiking activity that  
48 is characteristic of cortical recordings [58, 59, 47, 49]. However, classical balanced network  
49 theory has some critical limitations. While cortical circuits do appear to balance excitation  
50 with inhibition, this balance is not always as precise and spike trains are not as asynchronous  
51 as the theory predicts [20, 40, 11, 12, 37, 14, 16]. Moreover, precise balance is mathematically  
52 impossible under some biologically relevant connectivity structures [48, 45, 30], implying that  
53 the classical theory of balanced networks is limited in its ability to model the complexity of real  
54 cortical circuits.

55 We show that cortical circuits with structure that is incompatible with balance are suscep-  
56 tible to an amplification mechanism arising when excitatory-inhibitory balance is broken at the  
57 level of local subpopulations, but maintained at a global level. This mechanism of “imbalanced  
58 amplification” can be quantified by a linear, finite-size correction to the classical mean field  
59 theory of balanced networks that accounts for imperfect balance and local imbalance. Through  
60 several examples, we show that imbalanced amplification explains several experimentally ob-  
61 served cortical responses to natural and artificial stimuli.

## 62 2 Results

### 63 2.1 The arithmetic of imprecise balance in cortical circuits.

64 We begin by reviewing and demonstrating the classical mean-field theory of balanced networks  
65 and a linear correction to the large network limit that the theory depends on. A typical cortical  
66 neuron receives synaptic projections from thousands of neurons in other cortical layers, cortical  
67 areas or thalamus. These long range projections are largely excitatory and provide enough  
68 excitation for the postsynaptic neuron to spike at a much higher rate than the sparse spiking  
69 typically observed in cortex. The notion that excitation to cortical populations can be excessively  
70 strong has been posed in numerous studies and is typically resolved by accounting for local,  
71 lateral synaptic input that is net-inhibitory and partially cancels the strong, net-excitatory  
72 external synaptic input [19, 53, 58, 3, 51, 41]. Balanced network theory takes this cancellation  
73 to its extreme by considering the limit of large external, feedforward synaptic input that is  
74 canceled by similarly large local, recurrent synaptic input. In this limit, a linear mean-field  
75 analysis determines population-averaged firing rates in terms of the macroscopic connectivity  
76 structure of the network [58, 59].

77 To demonstrate these notions, we first simulated a recurrent network of  $N_E = 4000$  excita-  
78 tory (population  $E$ ) and  $N_I = 1000$  inhibitory spiking neurons (population  $I$ ) receiving synaptic  
79 connections from an “external” population ( $X$ ) of  $N_X = 4000$  excitatory neurons modeled as  
80 Poisson processes. Cortical circuits are often probed using optogenetic methods to stimulate or  
81 suppress targeted neuronal sub-populations [7, 15]. As a simple model of optogenetic stimulation  
82 of cortical pyramidal neurons, we added an extra inward current to all neurons in population  
83  $E$  halfway through the simulation (Fig. 1a). Neurons in the local population ( $E$  and  $I$ ) were  
84 modeled using the adaptive exponential integrate-and-fire (AdEx) model, which accurately cap-  
85 tures the responses of real cortical neurons [8, 25, 26]. Connectivity was random with each

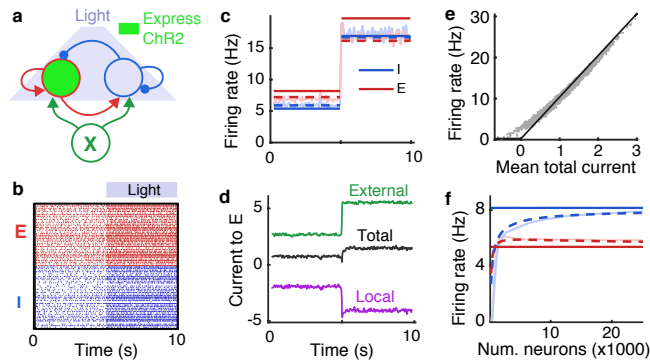

**Figure 1: Imprecise balance under optogenetic stimulation.** **a)** Schematic. A population of recurrently connected excitatory (red) and inhibitory (blue) spiking neuron models receive synaptic input from an external population ( $X$ ; green) of Poisson-spiking neurons. Optogenetic stimulation of excitatory neurons was modeled by an extra inward current to the excitatory population at 5s. **b)** Spike rasters from 50 randomly selected excitatory (red) and inhibitory (blue) neurons from recurrent network. **c)** Average firing rate of excitatory (red) and inhibitory (blue) neurons in the recurrent network from simulations (light solid), from the balanced network approximation (Eq. (3); solid dark) and from the corrected approximation (Eq. (4); dashed). **d)** Mean synaptic currents to 200 randomly selected excitatory neurons in the recurrent network from external inputs ( $X$ ; green), from the local population ( $E + I$ ; purple) and the total synaptic current (black). Currents are measured in units of the neurons' rheobase here and elsewhere (rheobase/ $C_m=10.5$  V/s). **e)** Mean firing rates plotted against mean input currents to all neurons in populations  $E$  and  $I$  (gray dots) and a rectified linear fit to their relationship (black line). **f)** Mean firing rates from identical simulations without stimulation except the total number of neurons,  $N$ , in the recurrent network was modulated while scaling synaptic weights and connection probabilities so that  $\epsilon \sim 1/\sqrt{N}$  (see Methods). Solid light curves are from simulations, solid dark from Eq. (3), and dashed from Eq. (4).

86 neuron receiving 800 synaptic inputs on average and postsynaptic potential amplitudes between  
 87 0.19 and 1.0 mV in amplitude. The recurrent network produced asynchronous, irregular spik-  
 88 ing (Fig. 1b), similar to that observed in cortical recordings [53, 52, 47, 17]. Firing rates in  
 89 populations  $E$  and  $I$  were similar in magnitude to those in population  $X$  and were increased  
 90 by optogenetic stimulation (Fig. 1c). As predicted by balanced network theory, local synaptic  
 91 input (from  $E$  and  $I$  combined) was net-inhibitory and approximately canceled the external  
 92 input from population  $X$  and artificial stimulation combined (Fig. 1d).

### 93 2.1.1 A review of the mean field theory of balanced networks

94 To capture the notion that the net external synaptic input to neurons is strong, we define the  
 95 small number,

$$\epsilon = \frac{1}{K_{EX}J_{EX}},$$

96 where  $K_{EX} = p_{EX}N_X$  is the average number of external synaptic projections received by each  
 97 neuron in  $E$  from all neurons in  $X$ ,  $p_{EX}$  is connection probability, and  $J_{EX}$  is the synaptic  
 98 strength of each connection. Specifically,  $J_{EX}$  is the total postsynaptic current induced in a  
 99 postsynaptic neuron in  $E$  by a single spike in a presynaptic neuron in  $X$ . Hence,  $1/\epsilon$  quantifies  
 100 the synaptic current that would be induced in each neuron in  $E$  (on average) if *every* neuron in  
 101  $X$  spiked once simultaneously. Using this convention, the mean synaptic input to each neuron  
 102 in populations  $E$  and  $I$  from all sources can be written in vector form as

$$\mathbf{I} = \frac{1}{\epsilon}[W\mathbf{r} + \mathbf{X}]. \quad (1)$$

103 where  $\mathbf{I} = [I_E \ I_I]^T$  (superscript  $T$  denotes the transpose) is the vector of mean synaptic input  
 104 to neurons in each population and similarly for their mean rates,  $\mathbf{r} = [r_E \ r_I]^T$ . The rescaled  
 105 external synaptic input,  $\mathbf{X} = [X_E \ X_I]^T$ , is given by

$$\mathbf{X} = W_X r_X + \begin{bmatrix} s \\ 0 \end{bmatrix}.$$

106 where  $r_X$  is the average rate of neurons in population  $X$  and  $s/\epsilon$  is the strength of the inward  
 107 current induced by optogenetic stimulation ( $s = 0$  when stimulation is off). The recurrent and  
 108 feedforward mean-field connectivity matrices are given by

$$W = \begin{bmatrix} w_{EE} & w_{EI} \\ w_{IE} & w_{II} \end{bmatrix} \quad \text{and} \quad W_X = \begin{bmatrix} w_{EX} \\ w_{IX} \end{bmatrix}. \quad (2)$$

109 respectively where  $w_{ab} = K_{ab} J_{ab} / (K_{EX} J_{EX})$  quantifies the relative number,  $K_{ab} = p_{ab} N_b$ , and  
 110 strength,  $J_{ab}$ , of synaptic connections from population  $b$  to  $a$ . To achieve moderate firing rates  
 111 when  $\epsilon$  is small, local input,  $W\mathbf{r}$ , must be net-inhibitory and partially cancel the strong external  
 112 excitation,  $\mathbf{X}$ , in Eq. (1).

113 Balanced network theory [58, 59] takes this cancellation to its extreme by considering the  
 114 limit of large number of neurons,  $N = N_E + N_I$ , while scaling connection strengths and proba-  
 115 bilities in such a way that  $\epsilon \sim \mathcal{O}(1/\sqrt{N}) \rightarrow 0$ . Under this scaling, Eq. (1) would seem to imply  
 116 that mean synaptic currents diverge in the limit, but this divergence is avoided in balanced  
 117 networks by a precise cancellation between external and recurrent synaptic input. To achieve  
 118 this cancellation, firing rates must satisfy the mean-field balance equation,

$$W\mathbf{r} + \mathbf{X} = 0$$

119 in the large  $N$  limit, so that [58, 59, 48, 45, 30]

$$\mathbf{r} = -W^{-1}\mathbf{X}. \quad (3)$$

120 Hence, balanced network theory provides a closed form, linear expression for firing rates in  
 121 the large network limit. Generally speaking, the firing rate of a neuron depends nonlinearly  
 122 on the mean and variance of its input current [3, 9, 46]. Notably, however, the derivation of  
 123 the fixed point in Eq. (3) did not require us to specify the exact form of this dependence.  
 124 Instead, Eq. (3) represents the unique fixed point firing rates for which synaptic currents remain  
 125 bounded as  $N \rightarrow \infty$ . More specifically, if Eq. (3) is not satisfied as  $N \rightarrow \infty$  then  $\|\mathbf{I}\| \rightarrow \infty$   
 126 (where  $\|\cdot\|$  is the Euclidean norm). The existence of this fixed point does not guarantee that it  
 127 is stable. Precise, general conditions on the accuracy of Eq. (3) for spiking network models are  
 128 not known and the investigation of such conditions is outside the scope of this study. However,  
 129 the approximation tends to be accurate in the  $N \rightarrow \infty$  limit whenever all eigenvalues of  $W$  have  
 130 negative real part, the solution in Eq. (3) is strictly positive, and inhibitory synaptic kinetics are  
 131 sufficiently fast [58, 59, 46, 32, 48, 45, 30]. Indeed, Eq. (3) provides a reasonable, but imperfect  
 132 approximation to firing rates in our spiking network simulation (Fig. 1c, compare light and dark  
 133 solid).

134 Balanced network theory has some critical limitations. Local cortical circuits are, of course,  
 135 finite in size so the  $N \rightarrow \infty$  (equivalently  $\epsilon \rightarrow 0$ ) limit may not be justified. Moreover, excitation  
 136 and inhibition in cortex may not be as perfectly balanced and spike trains not as asynchronous  
 137 as predicted by balanced network theory [20, 40, 11, 12, 55, 37, 14, 16]. More importantly,  
 138 under many biologically relevant connectivity structures, precise cancellation cannot be realized  
 139 so Eq. (3) cannot even be applied [48, 45, 30]. We next review a simple, linear correction to  
 140 Eq. (4) that partially resolves these issues.

### 2.1.2 A linear correction to precise balance

A correction to Eq. (3) can be obtained by considering  $\epsilon$  non-zero, but this requires making assumptions on the relationship between neurons' input statistics and firing rates. A simple approximation is obtained by assuming that population-averaged firing rates,  $\mathbf{r}$ , depend only on population-averaged mean inputs,  $\mathbf{I}$ , yielding the fixed points problem  $\mathbf{r} = f(\mathbf{I}) = f([\mathbf{W}\mathbf{r} + \mathbf{X}]/\epsilon)$  where  $f$  is the population-level f-I curve. When  $f$  is an increasing function over relevant ranges of  $\mathbf{I}$ , this fixed point equation can be re-written as

$$\mathbf{W}\mathbf{r} + \mathbf{X} = \epsilon f^{-1}(\mathbf{r}).$$

Hence, in strongly coupled networks ( $\epsilon$  small), the shape of f-I curves has a small effect on steady-state firing rates under such an approximation. Indeed, in the  $\epsilon \rightarrow 0$  limit, the f-I curve has no effect and firing rates are determined by Eq. (3). This conclusion easily generalizes to the case where  $f$  also depends on the average temporal variance of neurons' inputs.

A simple case of this approximation is obtained by using a rectified linear approximation,  $\mathbf{r} = g[\mathbf{I}]_+$  where  $[\cdot]_+$  denotes the positive part. We fit such a function to the relationship between neurons' mean synaptic inputs and firing rates from our spiking network simulation (Fig. 1e). Assuming that the average firing rates of all populations are positive, this rectified linear approximation produces a linear rate model [13] with mean firing rates given by solving  $\mathbf{W}\mathbf{r} + \mathbf{X} = \epsilon/g\mathbf{r}$  to obtain

$$\mathbf{r} = [\epsilon D - \mathbf{W}]^{-1} \mathbf{X} \quad (4)$$

where

$$D = \begin{bmatrix} 1/g & 0 \\ 0 & 1/g \end{bmatrix}.$$

The AdEx neuron model used in our simulations has a nonlinear f-I curve (Fig. 1e; gray dots) and its firing rate depends on all statistics of its input, not just the mean [8, 21]. Nevertheless, the linear approximation in Eq. (4) was accurate in predicting firing rates in our simulations (Fig. 1c, solid), outperforming the balanced network approximation from Eq. (3). This can be explained by the fact that the balanced approximation in Eq. (3) is already somewhat accurate and the linear approximation in Eq. (4) corrects for some of the error introduced by imperfect balance, even though the true dependence of  $\mathbf{r}$  on  $\mathbf{I}$  is nonlinear.

To further investigate the relative accuracy of Eqs. (3) and (4), we repeated the spiking network simulations from Fig. 1a-d while proportionally scaling the number of neurons ( $N_E$ ,  $N_I$ , and  $N_X$ ) in each population and scaling connection weights and probabilities in such a way that  $\epsilon \sim 1/\sqrt{N}$  (see Methods). As predicted by balanced network theory, excitatory and inhibitory firing rates increased toward the limit in Eq. (3) (Fig. 1f, compare light and dark solid lines). The linear correction in Eq. (4) tracks this increase in firing rates and is more accurate than the approximation in Eq. (3), particularly for smaller  $N$  (Fig. 1f, dashed). It is worth noting that, in applying Eq. (4) to obtain the dashed curve in Fig. 1f, we fixed the value of  $g$  to the one obtained from the simulation in Figs. 1a-e. Hence, a single estimate of the gain yields an accurate approximation even under different parameter values.

The predictive power of Eq. (4) in these examples is, of course, limited by the fact that it was only applied after estimating the gain of the neurons using firing rates obtained in simulations. Moreover, highly nonlinear f-I curves could introduce additional error. However, the purpose of Eq. (4) in this work is to provide a first-order approximation to and general understanding of firing rates in networks under which Eq. (3) cannot be applied. For these purposes, Eq. (4) is sufficient.

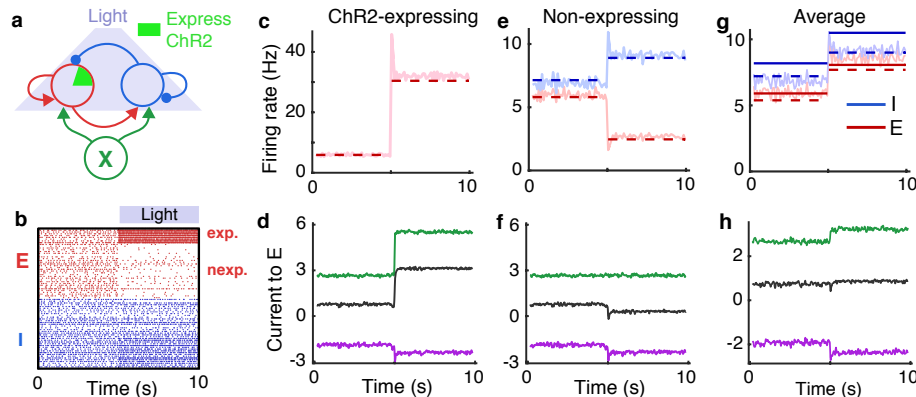

Figure 2: **Imbalanced amplification and suppression under partial optogenetic stimulation.** Same as Fig. 2 except the inward current was only provided to 20% of the excitatory neurons, modeling ChR2-expressing pyramidal cells. Firing rates of and input current to excitatory neurons are shown separately for ChR2-expressing (c,d) and non-expressing (e,f) neurons, as well as the average over all neurons (g,h). Firing rates predicted by Eq. (3) are not shown in c and e because Eq. (3) is not applicable to those cases.

## 2.2 Imbalanced amplification under partial optogenetic stimulation

We next show that a more realistic model of optogenetic stimulation breaks the classical balanced state, providing a demonstrative and experimentally relevant example of imbalanced amplification and suppression that explains phenomena observed in recordings from mouse somatosensory cortex.

### 2.2.1 Firing rates are increased by stimulating fewer neurons

The model of optogenetic stimulation considered in Fig. 1 is somewhat inaccurate since optogenetic stimulation of excitatory neurons is often incomplete. For example, only a fraction of cortical pyramidal neurons express the channelrhodopsin 2 (ChR2) protein targeted in many optogenetic experiments [7, 42, 44, 2]. To more accurately model optogenetic stimulation, we modified the example above so the extra inward current was provided to only 20% of the excitatory neurons (Fig. 2a), modeling ChR2-expressing pyramidal cells. This change produced surprising results. The ChR2-expressing neurons increased their firing rates by a larger amount than they did when all excitatory neurons received the current (Fig. 2b,c; compare to Fig. 1b,c). Hence, counterintuitively, stimulating fewer neurons actually *amplifies* the effects of stimulation on the targeted cells. In contrast, non-expressing excitatory neurons were *suppressed* during stimulation and inhibitory neurons increased their rates, but by a smaller amount than they did under complete stimulation (Fig. 2e; compare to Fig. 1c).

Similar effects were observed in experiments by Adesnik and Scanziani [2]. In that study, pyramidal neurons in layers (L) 2/3 of mouse somatosensory cortex (S1) were stimulated optogenetically, but only about 23% of the pyramidal neurons expressed ChR2. During stimulation, non-expressing L2/3 pyramidal neurons were suppressed and inhibitory synaptic currents increased, implying an increase in inhibitory neuron firing rates.

To understand these effects, we first extended the mean-field theory above to account for multiple subpopulations by defining

$$\mathbf{r} = \begin{bmatrix} r_{exp} \\ r_{nexp} \\ r_I \end{bmatrix}$$



207 to be the vector of average firing rates for the Chr2-expressing (*exp*), non-expressing (*nexp*)  
 208 excitatory neurons and inhibitory (*I*) neurons. The vector of average input to the network is  
 209 again given by Eq. (1) where

$$\mathbf{X} = W_X r_X + \begin{bmatrix} s \\ 0 \\ 0 \end{bmatrix},$$

210  $W_X = [w_{EX} \ w_{EX} \ w_{IX}]^T,$

$$W = \begin{bmatrix} qw_{EE} & (1-q)w_{EE} & w_{EI} \\ qw_{EE} & (1-q)w_{EE} & w_{EI} \\ qw_{IE} & (1-q)w_{IE} & w_{II} \end{bmatrix}$$

211 and  $q = 0.2$  represents the proportion of neurons that express Chr2.

212 Importantly,  $W$  is singular (*i.e.*, not invertible), so classical balanced network theory fails  
 213 for this example since Eq. (3) cannot be evaluated. More specifically, it is impossible for  $\mathbf{I}$  in  
 214 Eq. (1) to remain finite as  $\epsilon \rightarrow 0$  since there is no vector,  $\mathbf{r}$ , such that  $W\mathbf{r} = -\mathbf{X}$ . Intuitively,  
 215 this can be understood by noting that expressing and non-expressing excitatory neurons receive  
 216 the same local input on average (Fig. 2d,f, purple), since local connectivity is not specific to  
 217 Chr2 expression, but they receive different external input during stimulation (Fig. 2d,f, green).  
 218 Therefore, local synaptic input cannot simultaneously cancel the external input to both sub-  
 219 populations, so the precise cancellation required by classical balanced network theory cannot be  
 220 achieved (Fig. 2d,f, black). A similar mechanism has been used to explain a lack of cancellation  
 221 between positive and negative correlations in balanced networks [60, 49].

## 222 2.2.2 Amplification in the nullspace: a general analysis

223 We now give a general analysis of network responses when  $W$  is singular. The example of partial  
 224 optogenetic stimulation is then considered as a special case. If  $W$  is a singular matrix then only  
 225 vectors,  $\mathbf{X}$ , that are in the column space of  $W$  admit solutions to  $W\mathbf{r} + \mathbf{X} = 0$ . The column  
 226 space of  $W$  is defined as the linear space of all vectors,  $\mathbf{u}$ , such that  $\mathbf{u} = W\mathbf{r}$  for some  $\mathbf{r}$ . The  
 227 column space of a matrix,  $W$ , is the orthogonal complement of the nullspace of  $W^T$ . We can  
 228 therefore decompose

$$\mathbf{X} = \mathbf{X}_0 + \mathbf{X}_1$$

229 where  $\mathbf{X}_0 = \text{proj}_{N(W^T)} \mathbf{X}$  is the projection of  $\mathbf{X}$  onto the nullspace of  $W^T$  and  $\mathbf{X}_1 = \text{proj}_{C(W)} \mathbf{X}$   
 230 is the projection onto the column space of  $W$ . Moreover, note that  $\text{proj}_{N(W^T)} W\mathbf{r} = 0$  since  $W\mathbf{r}$   
 231 is in the column space of  $W$ . Therefore, the projection of the total input onto the nullspace of  
 232  $W^T$  is

$$\text{proj}_{N(W^T)} \mathbf{I} = \text{proj}_{N(W^T)} \frac{1}{\epsilon} [W\mathbf{r} + \mathbf{X}] = \frac{1}{\epsilon} \mathbf{X}_0. \quad (5)$$

233 Hence, the projection of the total synaptic input onto the nullspace of  $W^T$  is  $\mathcal{O}(1/\epsilon)$  whenever  $\mathbf{X}$   
 234 has an  $\mathcal{O}(1)$  component in the nullspace of  $W^T$ . Note that, despite the  $1/\epsilon$  term in Eq. (1), the  
 235 total synaptic input,  $\mathbf{I}$ , is  $\mathcal{O}(1)$  when balance is realized due to cancellation (as in Fig. 1d). Hence,  
 236 the singularity of  $W$  introduces large,  $\mathcal{O}(1/\epsilon)$  synaptic currents where they would not occur if  
 237  $W$  was non-singular. In other words, external input in the nullspace of  $W^T$  produces strong  
 238 synaptic currents in the network. Importantly, this conclusion does not rely on any assumptions  
 239 about neurons' f-I curves or other properties. This result is a fundamental property of balanced  
 240 networks or, more generally, networks receiving strong feedforward input.

241 To understand the implications of this result on firing rates in the network, however, we  
 242 must specify an f-I curve. We again consider the linear rate approximation quantified by Eq. (4).  
 243 Importantly, unlike Eq. (3) from classical balanced network theory, the approximation in Eq. (4)  
 244 is applicable to this example because it accounts for imperfect cancellation between local and

245 external inputs. Specifically, the regularized matrix,  $\epsilon D - W$ , is invertible so Eq. (4) can be  
 246 evaluated even though Eq. (3) cannot. The resulting firing rate solution from Eq. (4) agrees well  
 247 with spiking network simulations (Fig. 2c,e). Hence, Eq. (4) provides an accurate approximation  
 248 to firing rates in networks to which classical balanced network theory is not applicable at all.

249 Eq. (4) also provides a concise mathematical quantification of firing rates when  $W$  is singular.  
 250 Namely, if  $\mathbf{X}_0, \mathbf{X}_1 \sim \mathcal{O}(1)$  then firing rates can be expanded as

$$\mathbf{r} = \frac{1}{\epsilon} \mathbf{r}_0 + \mathbf{r}_1 \quad (6)$$

251 where  $\mathbf{r}_0$  is in the nullspace of  $W$  and  $\mathbf{r}_0, \mathbf{r}_1 \sim \mathcal{O}(1)$ . To derive this result, first note that Eq. (4)  
 252 can be rewritten as

$$W\mathbf{r} + \mathbf{X} = \epsilon D\mathbf{r}. \quad (7)$$

253 If  $\mathbf{X}$  has components in the nullspace of  $W^T$  then we can project both sides of this equation  
 254 onto this nullspace to obtain

$$\text{proj}_{N(W^T)} \mathbf{X} = \epsilon \text{proj}_{N(W^T)} D\mathbf{r}.$$

255 where we again used the fact that  $\text{proj}_{N(W^T)} W\mathbf{r} = 0$  since  $W\mathbf{r}$  is in the column space of  
 256  $W$ . Since  $\mathbf{X}_0 = \text{proj}_{N(W^T)} \mathbf{X}$  and  $D$  are assumed  $\mathcal{O}(1)$ , this equation is only consistent when  
 257  $\mathbf{r} \sim \mathcal{O}(1/\epsilon)$ . We can therefore decompose  $\mathbf{r} = (1/\epsilon)\mathbf{r}_0 + \mathbf{r}_1$  where  $\mathbf{r}_0, \mathbf{r}_1 \sim \mathcal{O}(1)$ . We next show  
 258 that  $\mathbf{r}_0$  is in the nullspace of  $W$ . From Eq. (7), we have

$$W \left[ \frac{1}{\epsilon} \mathbf{r}_0 + \mathbf{r}_1 \right] + \mathbf{X} = \epsilon D \left[ \frac{1}{\epsilon} \mathbf{r}_0 + \mathbf{r}_1 \right].$$

259 Isolating the  $\mathcal{O}(1/\epsilon)$  terms gives  $W\mathbf{r}_0 = 0$  and therefore  $\mathbf{r}_0$  is in the nullspace of  $W$ . In summary,  
 260 components of external input in the nullspace of  $W^T$  partially break balance to evoke amplified  
 261 firing rates in the nullspace of  $W$ .

262 In the special case that  $W$  has a one-dimensional nullspace, a more precise characterization  
 263 of  $\mathbf{r}_0$  is possible. Let  $\mathbf{v}_0$  be in the nullspace of  $W$  with  $\|\mathbf{v}_0\| = 1$ . Note that  $W^T$  also has a  
 264 one-dimensional nullspace (since  $W$  is a square matrix). Let  $\mathbf{v}_2$  be in the nullspace of  $W^T$  with  
 265  $\|\mathbf{v}_2\| = 1$ . Since  $\mathbf{r}_0$  is in the nullspace of  $W$ , we can write  $\mathbf{r}_0 = a\mathbf{v}_0$  for some scalar,  $a$ . Now, dot  
 266 product both sides of Eq. (7) by  $\mathbf{v}_2$  to obtain

$$\begin{aligned} \mathbf{v}_2 \cdot \mathbf{X} &= \epsilon \mathbf{v}_2 \cdot D\mathbf{r} \\ &= \mathbf{v}_2 \cdot D[\mathbf{r}_0 + \epsilon \mathbf{r}_1] \end{aligned}$$

267 where we have used that  $\mathbf{v}_2 \cdot W\mathbf{r} = 0$  since  $\mathbf{v}_2$  is in the nullspace of  $W^T$ , which is orthogonal to  
 268  $W\mathbf{r}$  in the column space of  $W$ . Keeping only  $\mathcal{O}(1)$  terms and making the substitution  $\mathbf{r}_0 = a\mathbf{v}_0$ ,  
 269 we get

$$a = \frac{\mathbf{v}_2 \cdot \mathbf{X}}{\mathbf{v}_2 \cdot D\mathbf{v}_0}$$

270 so that

$$\mathbf{r}_0 = \frac{\mathbf{v}_2 \cdot \mathbf{X}}{\mathbf{v}_2 \cdot D\mathbf{v}_0} \mathbf{v}_0, \quad (8)$$

271 yielding a concise expression for the amplified component of firing rates when  $W$  has a one-  
 272 dimensional nullspace. Note that  $\mathbf{v}_2 \cdot \mathbf{X} = \text{proj}_{N(W^T)} \mathbf{X} = \mathbf{X}_0$  and  $\mathbf{v}_0$  is in the nullspace of  $W$ ,  
 273 so this result is consistent with the more general conclusions above.



### 2.2.3 Amplification in the nullspace under partial optogenetic stimulation

For the specific example of partial optogenetic stimulation considered in Fig. 2, the nullspace of  $W^T$  is spanned by  $\mathbf{v}_2 = (1/\sqrt{2})[1 \ -1 \ 0]^T$  and the projection of  $\mathbf{X}$  onto the nullspace of  $W^T$  is  $\mathbf{X}_0 = [s/2 \ -s/2 \ 0]^T$ . The nullspace of  $W$  is spanned by  $\mathbf{v}_0 = (1/\sqrt{q^2 + (1-q)^2})[1-q \ -q \ 0]^T$ . We therefore have  $\mathbf{r} = (1/\epsilon)\mathbf{r}_0 + \mathbf{r}_1$  where Eq. (8) gives

$$\mathbf{r}_0 = gs \begin{bmatrix} 1-q \\ -q \\ 0 \end{bmatrix}.$$

Hence, ChR2-expressing neurons are amplified and non-expressing neurons are suppressed by optogenetic stimulation, as observed in simulations. A more precise result is given by expanding the full approximation from Eq. (4) to obtain

$$\mathbf{r}_{\text{on}} = \mathbf{r}_{\text{off}} + \frac{gs}{\epsilon} \begin{bmatrix} 1-q \\ -q \\ 0 \end{bmatrix} + \mathcal{O}(s) \begin{bmatrix} q \\ q \\ qc \end{bmatrix} + \mathcal{O}(\epsilon). \quad (9)$$

Here,  $\mathcal{O}(s)$  is a constant proportional to  $s$ ,  $c = |w_{IE}/w_{II}|$  and  $\mathbf{r}_{\text{off}}$  is the vector of firing rates in the balanced,  $\epsilon \rightarrow 0$ , limit when stimulation is off ( $s = 0$ ). Specifically,  $\mathbf{r}_{\text{off}}$  is the unique vector that satisfies  $W\mathbf{r}_{\text{off}} + W_X r_X = 0$ , which is solvable even though  $W$  is singular because  $W_X r_X$  is in the column space of  $W$ , so balance can be maintained when  $s = 0$ .

The  $\mathcal{O}(s/\epsilon)$  term in Eq. (9) quantifies the amplification and suppression observed in simulations: Non-expressing neurons are suppressed by stimulation since  $-q < 0$  and the response of ChR2-expressing neurons is amplified since  $1-q > 0$  and  $s/\epsilon$  is large. The  $\mathcal{O}(s)$  term shows why inhibitory neurons increase their rates by a smaller amount. In summary, the optogenetically induced suppression observed experimentally by Adesnik and Scanziani [2] is a generic feature of balanced or strongly coupled networks under partial stimulation.

### 2.2.4 Local imbalance with global balance explains intralaminar suppression and interlaminar facilitation

Interestingly, despite the break of balance at the level of ChR2-expressing and non-expressing subpopulations, global balance is maintained in this example. This can be understood by repeating the mean-field analysis above without partitioning neurons into ChR2-expressing and non-expressing sub-populations, thereby quantifying the global average of firing rate of all excitatory neurons. In particular, the average synaptic input,  $\mathbf{I} = [I_E \ I_I]^T$ , to excitatory and inhibitory neurons is given by Eq. (1) where  $W$  and  $W_X$  are as in Eq. (2), and

$$\mathbf{X} = W_X r_X + \begin{bmatrix} sq \\ 0 \end{bmatrix}$$

to account for the fact that only a proportion  $q$  of the excitatory neurons receive the inward current from optogenetic stimulation. In this case,  $W$  is non-singular so the balanced solution in Eq. (3) is applicable. Indeed, the average firing rates of all excitatory neurons in our spiking network simulation is close to the prediction from Eq. (3) and even closer to the prediction from Eq. (4) (Fig. 2g; compare to Fig. 1c). The average feedforward input to all excitatory neurons is canceled by net-inhibitory local input (Fig. 2h; compare to Fig. 1d). Hence, balance is maintained globally even though the network is imbalanced at the level of ChR2-expressing and non-expressing populations.

In the same study by Adesnik and Scanziani considered above [2], recordings were made in L5, which was not directly stimulated optogenetically, but receives synaptic input from L2/3.

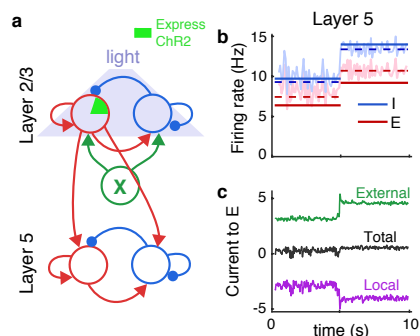

**Figure 3: Interlaminar facilitation despite intralaminar suppression under optogenetic stimulation.** **a)** Multi-layer network schematic. L2/3 was identical to the recurrent network in Fig. 2 and provided external excitatory input to L5, which had the same internal structure as the L2/3 model. **b)** Excitatory and inhibitory firing rates in L5. **c)** Average synaptic current to randomly sampled excitatory neurons in L5.

310 Interestingly, despite the fact that most excitatory neurons in L2/3 were suppressed during  
 311 stimulation, firing rates in L5 increased.

312 To model these experiments, we interpreted the recurrent network from Fig. 2 as a local  
 313 neural population in L2/3, which sends synaptic projections to L5 (Fig. 3a). We modeled a  
 314 neural population in L5 identically to the L2/3 population, except its feedforward input came  
 315 from excitatory neurons in the L2/3 network, instead of from Poisson-spiking neurons. As  
 316 in experiments [2], L5 neurons increased their firing rates during stimulation (Fig. 3b) and  
 317 approximate balance was maintained (Fig. 3c). This can be understood by noting that L5  
 318 receives synaptic input sampled from all excitatory neurons in L2/3. Hence, the feedforward  
 319 excitatory current to L5 neurons increases proportionally to the average excitatory firing rates in  
 320 L2/3 during stimulation. As we showed above, this average rate increases (Fig. 2e), despite the  
 321 fact that most excitatory neurons in L2/3 are suppressed by stimulation. Hence, the combination  
 322 of intralaminar suppression and interlaminar facilitation observed during optogenetic stimulation  
 323 in experiments [2] results from the fact that the stimulated layer is locally imbalanced, but  
 324 globally balanced during partial stimulation.

### 325 2.2.5 Imbalanced amplification of weak stimuli

326 Sufficiently small  $\epsilon$  or large  $s$  would introduce negative rates in Eq. (9), representing a regime  
 327 in which non-expressing neurons cease spiking and the firing rate of ChR2-expressing neurons  
 328 saturate at a high value. In this sense, firing rates do not truly have a  $\mathcal{O}(1/\epsilon)$  component for  $\epsilon$   
 329 very small. However, smaller values of  $\epsilon$  allow weak stimuli (small  $s$ ) to be strongly amplified.  
 330 Strictly speaking, if one takes  $s \sim \mathcal{O}(\epsilon)$ , then under the linear approximation in Eq. (4), partial  
 331 optogenetic stimulation would have an  $\mathcal{O}(1)$  effect on the average firing rate of stimulated and  
 332 unstimulated subpopulations, but an  $\mathcal{O}(\epsilon)$  effect on globally averaged firing rates. In practical  
 333 terms, this means that, in strongly coupled networks ( $\epsilon$  small), partial optogenetic stimuli can  
 334 have a moderate effect on the firing rates of stimulated neurons while having a negligible effect  
 335 on the average firing rates of all excitatory neurons.

336 To demonstrate this idea, we repeated the simulations from Fig. 2 in a network with four  
 337 times as many neurons ( $N = 2 \times 10^4$ ) where synaptic weights and probabilities were scaled so  
 338 that  $\epsilon \sim 1/\sqrt{N}$  (as in Fig. 1f) and we reduced stimulus strength,  $s$ , as well. In this simulation,  
 339 ChR2-expressing neurons' firing rates nearly doubled (Fig. 4a) and non-expressing neurons were  
 340 noticeably suppressed (Fig. 4b). However, the change in the average firing rate of all excitatory

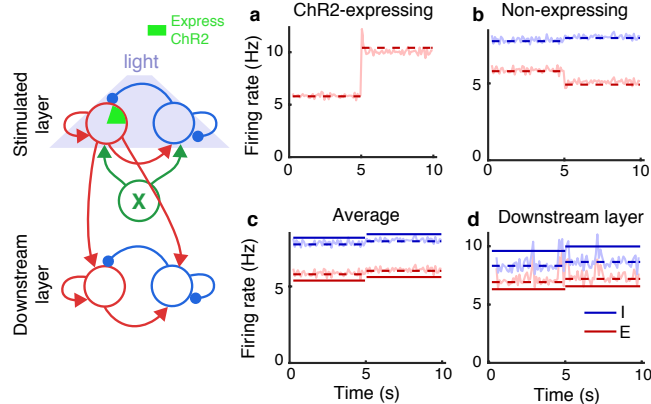

Figure 4: **Imbalanced amplification of weak stimuli.** **a-c)** Same as Fig. 2b,e,g except with  $N$  increased by a factor of four,  $\epsilon$  decreased by a factor of two, and a weaker stimulus. **d)** Same as Fig. 3b except using excitatory neurons from the recurrent network in a-c as the feedforward input.

341 neurons was nearly imperceptible (Fig. 4c) and similarly for the firing rates of inhibitory neurons  
 342 (Fig. 4b,c). As a result, the firing rates in a downstream layer were unnoticeably modulated  
 343 during stimulation (Fig. 4d; compare to Fig. 3). This effect could mask the effects of optogenetic  
 344 stimulation in recordings.

### 345 2.2.6 Imbalanced amplification with nearly singular connectivity matrices

346 An apparent limitation of the results above is that they rely on the singularity of the connectivity  
 347 matrix,  $W$ . Singularity is a fragile property of matrices that arises from structural symmetries.  
 348 In the example above, singularity arises from our implicit assumption that local synaptic connec-  
 349 tivity is independent of whether neurons express ChR2. Even a slight difference in connectivity  
 350 to or from ChR2-expressing neurons would make  $W$  non-singular so that its nullspace would  
 351 be empty, rendering Eq. (6) vacuous. We now show that Eq. (6) and the surrounding analysis  
 352 naturally extends to connectivity matrices that are approximately singular, with similar overall  
 353 conclusions.

354 A matrix,  $W$ , is singular if it has  $\lambda = 0$  as an eigenvalue. A matrix can therefore be  
 355 considered approximately singular if it has an eigenvalue with small magnitude. Specifically,  
 356 let  $\lambda$  be an eigenvalue of  $W$  with  $|\lambda| \ll 1$ . Note that  $\lambda$  is also an eigenvalue of  $W^T$ . Now let  
 357  $\mathbf{v}$  be the associated eigenvector so that  $W^T \mathbf{v} = \lambda \mathbf{v}$  and assume that  $\|\mathbf{v}\| = 1$  without loss of  
 358 generality. Take the projection of each term in Eq. (7) onto the subspace spanned by  $\mathbf{v}$  to get

$$\text{proj}_{\mathbf{v}}[W\mathbf{r}] + \text{proj}_{\mathbf{v}}\mathbf{X} = \epsilon \text{proj}_{\mathbf{v}}[D\mathbf{r}].$$

359 Now note that  $\text{proj}_{\mathbf{v}}[W\mathbf{r}] = \lambda \text{proj}_{\mathbf{v}}\mathbf{r}$ . Hence,

$$\lambda \text{proj}_{\mathbf{v}}\mathbf{r} + \text{proj}_{\mathbf{v}}\mathbf{X} = \epsilon \text{proj}_{\mathbf{v}}[D\mathbf{r}].$$

360 If  $\text{proj}_{\mathbf{v}}\mathbf{X} \sim \mathcal{O}(1)$  and  $\text{proj}_{\mathbf{v}}[D\mathbf{r}] \sim \text{proj}_{\mathbf{v}}\mathbf{r}$  then this implies

$$(|\lambda| + \epsilon) \text{proj}_{\mathbf{v}}\mathbf{r} \sim \text{proj}_{\mathbf{v}}\mathbf{X}.$$

361 Hence,

$$\mathbf{r} = \frac{1}{\delta} \mathbf{r}_0 + \mathbf{r}_1$$

362 where  $\delta = |\lambda| + \epsilon$ . This generalizes Eq. (6) to the case where  $W$  is only approximately singular. In  
363 summary, the mechanism of imbalanced amplification is a general property of strongly coupled  
364 networks with singular or nearly singular connection matrices.

365 We next show that networks with connection probabilities that depend on continuous quan-  
366 tities like distance or tuning preference necessarily have singular or nearly singular connectivity  
367 kernels and are therefore naturally susceptible to the amplification and suppression mechanisms  
368 described above.

## 369 **2.3 Imbalanced amplification and suppression in continuously indexed** 370 **networks**

371 So far we considered networks with discrete subpopulations. Connectivity in many cortical cir-  
372 cuits depends on continuous quantities like distance in physical or tuning space. To understand  
373 how the amplification and suppression mechanisms discussed above extend to such connectivity  
374 structures, we next considered a model of a visual cortical circuit. We arranged  $2 \times 10^5$  AdEx  
375 model neurons (80% excitatory and 20% inhibitory) on a square domain, modeling a patch of  
376 L2/3 in mouse primary visual cortex (V1). Neurons received external input from a similarly  
377 arranged layer of  $1.6 \times 10^5$  Poisson-spiking neurons, modeling a parallel patch of L4 (Fig. 5a).  
378 We additionally assigned a random orientation preference to each neuron, modeling the “salt-  
379 and-pepper” distribution of orientation preferences in mouse V1. Connectivity was probabilistic  
380 and, as in cortex [23, 28, 33], inter- and intralaminar connections were more numerous between  
381 nearby and similarly tuned neurons. Specifically connection probability decayed like a Gaussian  
382 as a function of distance in physical and orientation space (Fig. 5b), where distance in both  
383 spaces was measured using periodic boundaries.

### 384 **2.3.1 Amplification and suppression from spatially narrow stimuli**

385 An oriented stimulus localized in the animal’s visual field (Fig. 5c) was modeled by imposing  
386 firing rate profiles in L4 that were peaked at the associated location in physical and tuning  
387 space, again with a Gaussian profile (Fig. 5d,e). This produced external input to L2/3 that was  
388 similarly peaked, but was nearly perfectly canceled by net-inhibitory lateral input (Fig. 5f,g).  
389 Excitatory and inhibitory firing rate profiles in L2/3 were also peaked at the associated location  
390 in physical and tuning space (Fig. 5h,i), demonstrating that neurons in L2/3 were appropriately  
391 tuned to the stimulus.

392 A smaller visual stimulus was modeled by shrinking the spatial profile of firing rates in L4  
393 while leaving the orientation-dependence of L4 rates unchanged (Fig. 5j,k). As above, synaptic  
394 inputs and firing rate profiles were appropriately peaked in physical and orientation tuning space  
395 (Fig. 5l-o). However, the smaller stimulus produced a surprising change to firing rates in L2/3.  
396 Despite the fact that L2/3 neurons at all locations received less excitation from L4 (Fig. 5l), peak  
397 firing rates in L2/3 increased and a surround suppression dynamic emerged (Fig. 5n). Hence,  
398 a more localized external input produced an amplification and suppression dynamic similar to  
399 the one observed in our model of optogenetic stimulation (compare to Fig. 2). On the other  
400 hand, responses in orientation tuning space were mostly unchanged by the smaller stimulus size  
401 (Fig. 5m,o).

### 402 **2.3.2 Mean-field theory of balance in two-dimensional spatial networks** 403 **with orientation-tuning-specific connectivity**

404 The mean-field theory of balanced networks was previously extended to continuously indexed  
405 networks in one and two dimensions [34, 48, 49]. We now review a straightforward extension to

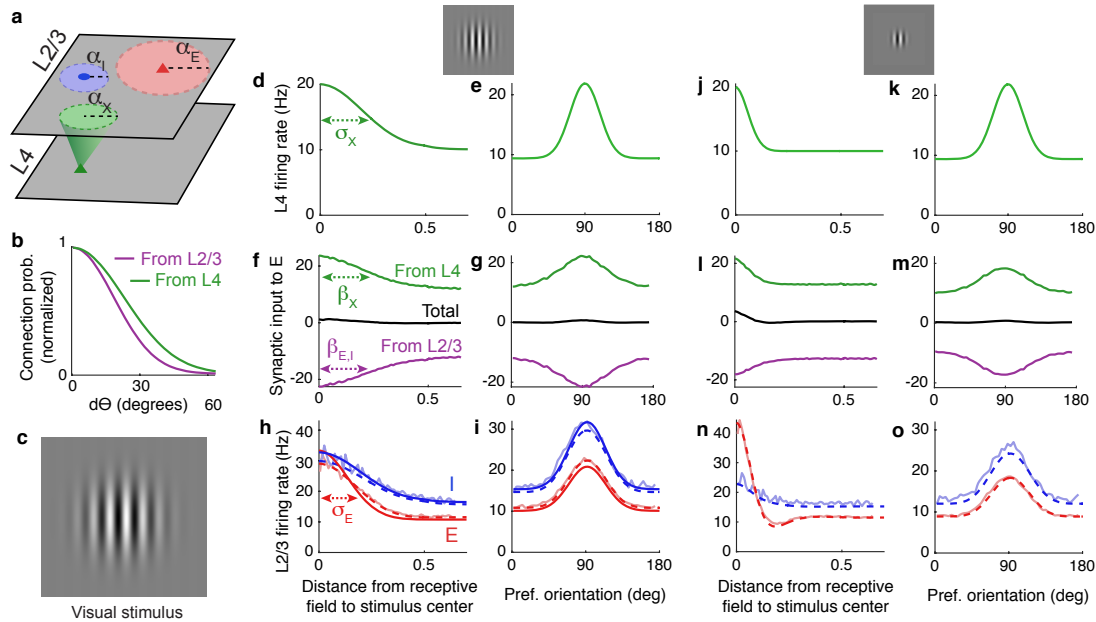

**Figure 5: Response properties of a continuously indexed network.** **a)** Network diagram. Poisson spiking neurons in L4 ( $X$ ) provide external synaptic input to  $2 \times 10^5$  recurrently connected excitatory and inhibitory AdEx model neurons ( $E$  and  $I$ ) in L2/3. The spatial width of synaptic projections from population  $a = X, E, I$  is given by  $\beta_a$ . **b)** Neurons are assigned random orientations and connection probability also depends on the difference,  $d\theta$ , between neurons' preferred orientation. **c)** An oriented stimulus in the animal's visual field. **d,e)** The location of the stimulus is modeled by firing rates in L4 that are peaked at the location of the stimulus in physical and orientation space. **f,g)** Synaptic current to neurons in population  $E$  from the external network (green), the local network (purple) and total (black) as a function distance from the receptive field center and as a function of neurons' preferred orientation. **h,i)** Firing rate profiles of excitatory (red) and inhibitory (blue) neurons in the local network from simulations (light curves), classical balanced network theory (solid, dark curves; from Eq. (13)) and under the linear correction (dashed; from Eq. (17)) in physical and orientation space. **j-o)** Same as (d-i) except for a smaller visual stimulus, modeled by a narrower spatial firing rate profile in L4.

406 two spatial dimensions and one orientation dimension. Eq. (1) generalizes naturally to

$$\mathbf{I} = \frac{1}{\epsilon} [\mathcal{W}\mathbf{r} + \mathbf{X}] \quad (10)$$

407 where  $\mathbf{r}(\mathbf{x}, \theta) = [r_E(\mathbf{x}, \theta) \ r_I(\mathbf{x}, \theta)]^T$  is the vector of mean firing rates of excitatory and inhibitory  
 408 L2/3 neurons near spatial coordinates  $\mathbf{x} = (x, y)$  with preferred orientation near  $\theta$ , and similarly  
 409 for the neurons' external input,  $\mathbf{X}(\mathbf{x}, \theta)$ , and total input,  $\mathbf{I}(\mathbf{x}, \theta)$ . The external input is given by  
 410  $\mathbf{X} = \mathcal{W}_X r_X$  where  $r_X(\mathbf{x}, \theta)$  is the profile of firing rates in L4. The connectivity kernels,  $\mathcal{W}$  and  
 411  $\mathcal{W}_X$ , are convolution integral operators defined by

$$\mathcal{W}\mathbf{r} = \begin{bmatrix} w_{EE} * r_E + w_{EI} * r_I \\ w_{IE} * r_E + w_{II} * r_I \end{bmatrix}$$

412 and

$$\mathcal{W}_X r_X = \begin{bmatrix} w_{EX} * r_X \\ w_{IX} * r_X \end{bmatrix}.$$

413 Here,  $w_{ab}(\mathbf{x}, \theta)$  is the mean-field connection strength between neurons separated by  $\mathbf{x}$  in physical  
 414 space and  $\theta$  in orientation space (see Methods), and  $[w_{ab} * r_b](\mathbf{x}, \theta)$  denotes circular convolution  
 415 with respect to  $\mathbf{x}$  and  $\theta$ , *i.e.*, convolution with periodic boundaries. These convolution operators  
 416 implement low-pass filters in orientation and physical space, capturing the effects of synaptic  
 417 divergence and tuning-specific connection probabilities. Similar filters describe feedforward con-  
 418 nectivity in artificial convolutional neural networks used for image recognition [31].

419 Taking  $\epsilon \rightarrow 0$  in Eq. (10) shows that that firing rates must satisfy

$$\mathcal{W}\mathbf{r} + \mathbf{X} = 0. \quad (11)$$

420 This is an analogue to Eq. (7) for spatial networks. From here, one may be tempted to invert  
 421 the integral operator  $\mathcal{W}$  to obtain a spatial analogue of Eq. (3). However, integral operators are  
 422 never invertible [56]. Specifically, since Eq. (11) is an integral equation of the first kind, there  
 423 necessarily exist external input profiles,  $\mathbf{X}(\mathbf{x}, \theta)$ , for which Eq. (11) does not admit a solution  
 424 so that the classical balanced state cannot be realized [48]. This implies that there always  
 425 exist inputs that prevent a continuously indexed network from maintaining excitatory-inhibitory  
 426 balance. To better understand why this is the case, we follow previous work [5, 34, 48, 50, 49]  
 427 in transitioning to the spatial Fourier domain to rewrite Eq. (11) as

$$\widetilde{\mathcal{W}} \widetilde{\mathbf{r}} + \widetilde{\mathbf{X}} = 0. \quad (12)$$

428 Here,  $\widetilde{\mathbf{r}}(\mathbf{n}, k) = [\widetilde{r}_E(\mathbf{n}, k) \ \widetilde{r}_I(\mathbf{n}, k)]^T$  is a Fourier coefficient of  $\mathbf{r}(\mathbf{x}, \theta)$  and similarly for  $\widetilde{\mathbf{X}}(\mathbf{n}, k) =$   
 429  $\widetilde{\mathcal{W}}_X(\mathbf{n}, k) \widetilde{r}_X(\mathbf{n}, k)$  where  $\mathbf{n} = (n_1, n_2)$  is the two-dimensional spatial Fourier mode and  $k$  is the  
 430 Fourier mode in tuning space. Importantly, the convolution operators above become ordinary  
 431 matrices in the Fourier domain. Specifically,

$$\widetilde{\mathcal{W}} = \begin{bmatrix} \widetilde{w}_{EE} & \widetilde{w}_{EI} \\ \widetilde{w}_{IE} & \widetilde{w}_{II} \end{bmatrix}$$

432 and

$$\widetilde{\mathcal{W}}_X = \begin{bmatrix} \widetilde{w}_{EX} \\ \widetilde{w}_{IX} \end{bmatrix}$$

433 where  $\widetilde{w}_{ab}(\mathbf{n}, k)$  is a Fourier coefficient of  $w_{ab}(\mathbf{x}, \theta)$ . Note that going from Eq. (11) to Eq. (12)  
 434 requires that  $\mathcal{W}$  is a convolution operator and that the boundaries of the network are treated  
 435 periodically, *i.e.*, the convolutions are circular.



436 Solving Eq. (12) gives an analogue to Eq. (3) for spatial networks in the Fourier domain,

$$\tilde{\mathbf{r}} = -\widetilde{W}^{-1}\widetilde{\mathbf{X}}. \quad (13)$$

437 This equation gives all Fourier coefficients,  $\tilde{\mathbf{r}}(\mathbf{n}, k)$ . However, this solution is only viable when  
 438 the inverse transform exists, *i.e.*, when the Fourier series of  $\tilde{\mathbf{r}}(\mathbf{n}, k)$  converges, which in turn  
 439 requires that  $\|\widetilde{\mathbf{X}}(\mathbf{n}, k)\|$  converges to zero faster than  $\|\widetilde{W}(\mathbf{n}, k)\|$  as  $\mathbf{n} \rightarrow 0$  and  $k \rightarrow 0$ . More  
 440 specifically,  $\tilde{\mathbf{r}}(\mathbf{n}, k)$  in Eq. (13) must be square-summable. Hence, balance can only be realized  
 441 when recurrent connectivity, quantified by  $\widetilde{W}(\mathbf{n}, k)$ , has more power at high spatial frequencies  
 442 than external input,  $\widetilde{\mathbf{X}}(\mathbf{n}, k)$ . In other words, for balance to be realized, external input,  $\mathbf{X}(\mathbf{x}, \theta)$ ,  
 443 cannot have “sharper” spatial features than the recurrent connectivity kernels,  $w_{ab}(\mathbf{x}, \theta)$  for  
 444  $a, b = E, I$ .

### 445 2.3.3 Balance and imbalance in networks with Gaussian-shaped connectiv- 446 ity kernels

447 A more intuitive understanding of when and why balance is broken is provided by considering the  
 448 Gaussian-shaped connectivity and firing rate profiles used in our spiking network simulations.  
 449 This explanation applies equally to the spatial profile of firing rates and connectivity in physical  
 450 and orientation space, so we do not distinguish between the two in this discussion. Similar  
 451 calculations were performed previously for spatial networks [48], so we only review the results  
 452 here and discuss some of their implications here.

453 Let  $\sigma_a$  be the width of the Gaussian firing rate profile in population  $a$ ,  $\alpha_a$  the width of  
 454 outgoing synaptic connections from the presynaptic neurons in population  $a$ , and  $\beta_a$  the width  
 455 of the spatial profile of synaptic input from population  $a$  (Fig. 5a,d,f,h). Synaptic divergence  
 456 broadens the profile of synaptic currents so that

$$\beta_a^2 = \sigma_a^2 + \alpha_a^2. \quad (14)$$

457 For balance to be maintained, feedforward synaptic input from L4 must be precisely canceled  
 458 by lateral synaptic input in L2/3. This, in turn, requires that

$$\beta_E = \beta_I = \beta_X.$$

459 Combined with Eq. (14), this implies that balance requires the widths of firing rate profiles in  
 460 L2/3 to satisfy [48]

$$\begin{aligned} \sigma_E^2 &= \beta_X^2 - \alpha_E^2 \\ \sigma_I^2 &= \beta_X^2 - \alpha_I^2. \end{aligned} \quad (15)$$

461 This approximation accurately predicted firing rate profiles in our first spiking network simu-  
 462 lation (Fig. 5h,i, solid, dark curves have widths given by Eq. (15)). Hence, by Eq. (15), the  
 463 requirement of cancellation in balanced networks implies that recurrent connectivity sharpens  
 464 neurons’ tuning, both in physical and orientation space.

465 Interestingly, Eq. (15) implies that the amount by which excitatory and inhibitory firing  
 466 rate profiles are sharpened in balanced networks is determined by the width of their *outgoing*  
 467 synaptic projections. Pyramidal neurons in L2/3 of mouse V1 preferentially target similarly  
 468 tuned neurons in L2/3, but the tuning of these lateral connection probabilities is much broader  
 469 than the tuning of pyramidal neurons’ firing rates [28] ( $\alpha_E > \sigma_E$  in orientation space). This  
 470 observation is consistent with Eq. (15): Excitatory neuron tuning curves are sharpened precisely  
 471 because their outgoing connections are broadly tuned. Hence, sharpening of excitatory neuron  
 472 tuning curves in L2/3 is naturally achieved in balanced networks with lateral excitation, without  
 473 requiring lateral inhibition. Following the same line of reasoning, the broader orientation tuning

474 of inhibitory neurons [23] ( $\sigma_I$  larger) suggests that they project more locally in orientation  
 475 tuning space than pyramidal neurons ( $\alpha_I < \alpha_E$  in orientation space).

476 Eqs. (15) also clarify when and why balanced network theory fails for continuously indexed  
 477 networks. If external inputs are sharper than lateral connectivity ( $\beta_X < \alpha_E$  or  $\beta_X < \alpha_I$ ) in  
 478 physical or orientation space, then Eqs. (15) do not yield real solutions for  $\sigma_E$  or  $\sigma_I$ . In other  
 479 words, balance requires that

$$\alpha_E < \beta_X \text{ and } \alpha_I < \beta_X$$

480 because Eq. (11) does not admit a solution when these inequalities are broken [48]. In other  
 481 words, the classical balanced state cannot be realized when external synaptic input is too lo-  
 482 calized for the recurrent network to cancel with its broader connectivity. As a result, balanced  
 483 network theory cannot be applied to the example in Fig. 5j-o with a smaller visual stimulus.

### 484 **2.3.4 A linear correction to balance quantifies amplification and suppres-** 485 **sion in continuously indexed networks**

486 We next derive a linear correction to Eq. (13) that accounts for imperfect cancellation and,  
 487 in doing so, gives firing rate approximations where classical balanced network theory fails.  
 488 Specifically, we generalize the derivation of Eq. (4) to continuously indexed networks. Under  
 489 this linear approximation, firing rate profiles are given by solving

$$\mathcal{W}\mathbf{r} + \mathbf{X} = \epsilon\mathbf{r}. \quad (16)$$

490 This is an integral equation of the second kind, which generically admits firing rate solutions,  
 491  $\mathbf{r}$ , even when Eq. (11) does not [56]. We again transition to the Fourier domain so Eq. (16)  
 492 becomes

$$\tilde{\mathbf{r}} = [\epsilon D - \widetilde{\mathcal{W}}]^{-1} \widetilde{\mathbf{X}}. \quad (17)$$

493 From Eq. (17), firing rates,  $\mathbf{r}(\mathbf{x}, \theta)$ , can be computed numerically through an inverse transform  
 494 (the Fourier series over  $\mathbf{n}$  and  $k$ ), yielding an accurate approximation to firing rates from spiking  
 495 network simulations even where classical balanced network theory fails (Fig. 5n,o).

496 The amplification and suppression caused by the smaller visual stimulus can be roughly  
 497 explained by the balanced amplification mechanism discussed previously. Since  $\mathcal{W}$  is a low-pass  
 498 filter, it approximately cancels high frequency components of firing rate profiles. Hence, high  
 499 frequency components are in the approximate nullspace of the local connectivity operator,  $\mathcal{W}$ ,  
 500 and are therefore amplified by the network through the same mechanism discussed for discrete  
 501 networks previously.

502 A more precise explanation is given by first averaging firing rates over orientation preference  
 503 by setting  $k = 0$  in Eq. (17) to give  $\tilde{\mathbf{r}}(\mathbf{n})$  that depends only on spatial frequency, and similarly for  
 504  $\widetilde{\mathbf{X}}(\mathbf{n})$  and  $\widetilde{\mathcal{W}}(\mathbf{n})$ . The convolution operator,  $\mathcal{W}$ , implements a low-pass filter, so  $\widetilde{\mathcal{W}}(\mathbf{n})$  is  $\mathcal{O}(1)$   
 505 in magnitude at low spatial frequencies and converges to zero at higher frequencies (large  $\|\mathbf{n}\|$ ).  
 506 The regularized inverse,  $[\epsilon D - \widetilde{\mathcal{W}}(\mathbf{n})]^{-1}$ , is therefore  $\mathcal{O}(1)$  in magnitude at low frequencies and  
 507  $\mathcal{O}(1/\epsilon)$  at higher frequencies (Fig. 6a, purple). When external input,  $\mathbf{X}(\mathbf{x})$ , has sharp features,  
 508  $\widetilde{\mathbf{X}}(\mathbf{n})$  has power at higher spatial frequencies (Fig. 6a, green), which are amplified by the  $\mathcal{O}(1/\epsilon)$   
 509 component of  $[\epsilon D - \widetilde{\mathcal{W}}(\mathbf{n})]^{-1}$  while low frequencies remain  $\mathcal{O}(1)$ . The result is that the magnitude  
 510 of  $\tilde{\mathbf{r}}(\mathbf{n})$  has a  $\mathcal{O}(1/\epsilon)$  peak at a non-zero spatial frequency (Fig. 6a, black), introducing a high-  
 511 amplitude, non-monotonic rate profile (as in Fig. 5n; see [50] for a similar analysis). When  
 512  $\mathbf{X}(\mathbf{x})$  has spatially broad features,  $\widetilde{\mathbf{X}}(\mathbf{n})$  has little power at high spatial frequencies so that  
 513 this amplification dynamic is weak or absent (as in Fig. 5h). An identical argument applies  
 514 in orientation space. In summary, high-frequency components of external input profiles are  
 515 transmitted more strongly than low-frequency components in strongly coupled networks, and  
 516 the cutoff frequency is determined by the width ( $\alpha_E$  or  $\alpha_I$ ) of lateral synaptic projections.

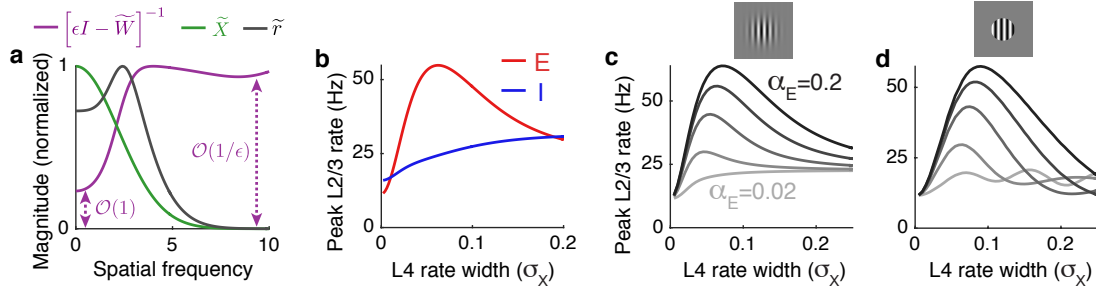

Figure 6: **Spatial filtering of external input and the dependence of suppression on outgoing synaptic projection width.** **a)** The magnitude of the spatial filter,  $[\epsilon D - \tilde{W}(n)]^{-1}$ , imposed by recurrent connections (purple), the external input ( $\tilde{\mathbf{X}}(n)$ , green) and the resulting firing rate profile ( $\tilde{\mathbf{r}}(n)$ , black) as a function of the spatial frequency,  $\|\mathbf{n}\| = \sqrt{m^2 + n^2}$ , from the simulation in Fig. 5j-o. Magnitude is measured by the Frobenius norm for  $[\epsilon D - \tilde{W}(n)]^{-1}$ . Curves normalized by their peaks. **b)** Firing rates of excitatory (red) and inhibitory (blue) neurons with receptive fields at the center of a grating stimulus plotted as the width of the stimulus increases (represented by increasing  $\sigma_X$ ) using parameters from Fig. 5j-o. **c)** Same as b, but the excitatory rate is plotted for different widths of the excitatory synaptic projection width,  $\alpha_E$ . **d)** Same as c, but firing rates in L4 are shaped like a disc with radius  $\sigma_X$  instead of a Gaussian with width parameter  $\sigma_X$ .

517 It is worth noting that the average firing rates (over all orientations and spatial positions)  
 518 are given by the zero Fourier coefficient  $\tilde{\mathbf{r}}(\mathbf{0}, 0)$ . When balance is broken by sharp external  
 519 input features, the zero Fourier mode is not affected as long as mean firing rates,  $\mathbf{r}(\mathbf{x}, \theta)$ , remain  
 520 non-zero at all locations and orientations. Hence, sharp input features can break balance locally  
 521 without breaking global, network-averaged, balance. This is analogous to the global balance  
 522 obtained in the optogenetic example when local balance was broken at the level of subpopulations  
 523 (Fig. 2).

### 524 2.3.5 Implications of imbalanced amplification on receptive field tuning

525 We next considered a study by Adesnik et al. [1] in which drifting grating stimuli of varying sizes  
 526 were presented to mice while recording from neurons in L2/3 of V1. In that study, pyramidal  
 527 neurons' firing rates first increased then decreased as the stimulus size was increased. On the  
 528 other hand, somatostatin-expressing (SOM) neuron's firing rates increased monotonically with  
 529 stimulus size. Intracellular recordings combined with optogenetic stimulation in that study  
 530 showed that SOM neurons project locally and pyramidal neurons form longer range projections.

531 To test our model against these findings, we applied Eq. (17) to a network with local inhibition  
 532 and longer-range excitation ( $\alpha_E > \alpha_I$ ) with increasing size of a visual stimulus (increasing  
 533  $\sigma_X$ ). Our results are consistent with recordings in Adesnik *et al.*, 2012 [1]: Excitatory neuron  
 534 firing rates changed non-monotonically with stimulus size, while inhibitory neuron firing rates  
 535 monotonically increased (Fig. 6b). The non-monotonic dependence of excitatory firing rates on  
 536 stimulus size in Fig. 6b is explained by the mechanism of imbalanced amplification. When  $\sigma_X$   
 537 is sufficiently small, balance is broken so imbalanced amplification introduces a large peak firing  
 538 rate surrounded by suppression (as in Fig. 5n). However, the total amount of external excitation  
 539 introduced by the stimulus is proportional to the size of the stimulus, so a very small  $\sigma_X$  intro-  
 540 duces very little excitation and peak firing rates are small. As  $\sigma_X$  increases, more excitation is  
 541 recruited and the network is still imbalanced, which leads to increasingly large peak firing rates  
 542 (as in Fig. 5n). Once  $\sigma_X$  becomes large, balance begins to be restored and the peak excitatory  
 543 firing rate decreases to moderate values (as in Fig. 5h).

544 The degree to which excitatory neurons suppress depends on the spatial width,  $\alpha_E$ , of lateral  
545 excitatory projections (Fig. 6c) and suppression of inhibitory neurons similarly depends on the  
546 spatial width,  $\alpha_I$ , of lateral inhibition (not pictured). Specifically, suppression occurs when  
547 lateral connectivity is broader than feedforward input ( $\alpha_E > \beta_X$  or  $\alpha_I > \beta_X$ ) because this is  
548 when the balanced solution in Eq. (15) disappears. When a sub-population’s lateral connectivity  
549 is more localized than feedforward connectivity from L4 ( $\alpha_E < \alpha_X$  as in the lightest gray curve  
550 in Fig. 6c; or  $\alpha_I < \alpha_X$ ), that sub-population cannot exhibit suppression since feedforward input  
551 width ( $\beta_X^2 = \alpha_X^2 + \sigma_X^2$ ) is always larger than lateral connectivity, regardless of the stimulus size  
552 ( $\sigma_X$ ).

553 A similar line of reasoning explains why peak inhibitory neuron firing rates increase mono-  
554 tonically with stimulus size in Fig. 6b. Inhibitory neurons in that example project locally  
555 ( $\alpha_I = \alpha_X$ ), so the inequality  $\alpha_I < \beta_X$  is always satisfied because  $\beta_X = \sqrt{\alpha_X^2 + \sigma_X^2} > \alpha_I$  when-  
556 ever  $\alpha_I \leq \alpha_X$ . Whenever  $\alpha_I < \beta_X$ , inhibitory firing rates reflect their balanced state values  
557 which increase monotonically with the increase in total excitation induced by a larger stimulus.

558 Unlike SOM neurons, parvalbumin-expressing (PV) neurons were found to exhibit suppres-  
559 sion by Adesnik *et al.*, 2012 [1]. Hence, our theory predicts that PV neurons project more  
560 broadly in space than SOM neurons. Indeed, PV interneurons in L2/3 are primarily basket cells  
561 whose axons project to larger lateral distances than other inhibitory neuron subtypes such as  
562 Martinotti cells that comprise most SOM neurons [24].

563 We observed a unimodal dependence of firing rate on stimulus size (Fig. 6c, all curves have a  
564 single peak). However, Rubin, *et al.* [50] observed a multi-modal, oscillatory dependence of firing  
565 rate on stimulus size in recordings and in a computational model. In that study, the drifting  
566 grating stimuli were disc-shaped with a sharp cutoff of contrast at the edges of the disc. Above,  
567 we considered a Gaussian-shaped contrast profile with soft edges (Fig. 6c, inset). Repeating our  
568 calculations with a sharp-edged, disc-shaped stimulus (Fig. 6d, inset) produced an oscillatory  
569 dependence of firing rate on stimulus size (Fig. 6d), as observed by Rubin *et al.*. This oscillation  
570 only arose when lateral synaptic projections were narrower than the stimulus size ( $\alpha_E$  small).  
571 The oscillation results from a Gibbs phenomenon: The sharp edge in the stimulus produces  
572 high-frequency power in  $\tilde{X}$ , which passes through the high-pass filter  $[\epsilon D - \tilde{W}]^{-1}$  when  $\alpha_E$  is  
573 small.

574 We next explored the functional consequences of these results on receptive field tuning. We  
575 first considered a disc-shaped grating stimulus (Fig. 7a), producing a disc-shaped firing rate  
576 profile in L4 (Fig. 7b). Synaptic divergence causes the profile of synaptic input from L4 to  
577 L2/3 to be “blurred” at the edges (Fig. 7c), as quantified by the low-pass filter,  $\mathcal{W}_X$ . This  
578 illustrates a fundamental problem in receptive field tuning: Synaptic divergence from one layer  
579 to another implements a low-pass filter that blurs sharp features. This problem is resolved by  
580 our observation above that lateral, recurrent connectivity implements a high-pass filter. If the  
581 width of lateral, excitatory connections in L2/3 is similar to that of feedforward connections  
582 from L4, the high-pass filter implemented by the recurrent network cancels the low-pass filter  
583 implemented by feedforward connectivity, effectively implementing a deconvolution that can  
584 recover the sharpness of firing rate profiles in L4 (Fig. 7d-f). Hence, counterintuitively, *broader*  
585 lateral excitation actually *sharpen*s receptive field tuning. Broadening lateral connections further  
586 increases the sharpness of the firing rate profiles, but introduce oscillatory, Gibbs phenomena  
587 near sharp features (Fig. 7f). These points are illustrated more clearly in an example with an  
588 asymmetrically shaped stimulus (Fig. 7g-1). Hence, the high-pass filter described above corrects  
589 the blurring caused by synaptic divergence between layers in V1.

590 In summary, imbalanced amplification and linear rate models provide a concise and parsimo-  
591 nious theoretical basis for understanding how suppression, amplification and tuning depends on  
592 the profile of neuron’s incoming and outgoing synaptic projections in physical and orientation  
593 tuning space.

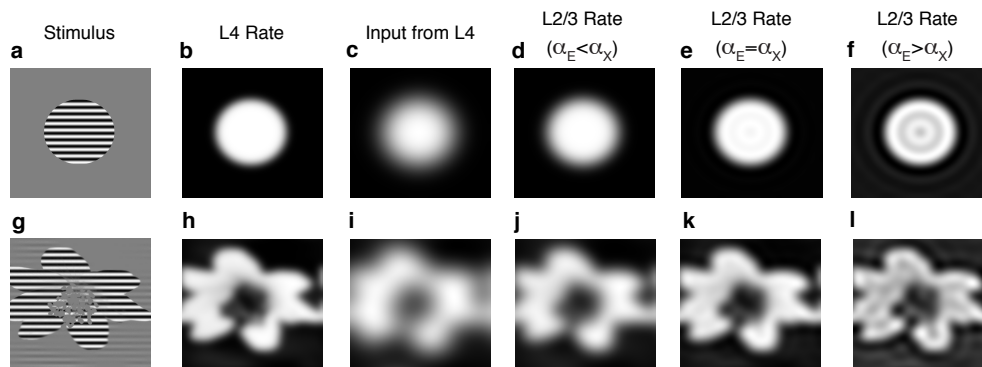

Figure 7: **Imbalanced amplification and suppression reverse the blurring introduced by inter-laminar synaptic divergence.** **a)** A disc-shaped grating stimulus gives rise to **b)** a disc-shaped firing rate profile,  $r_X(\mathbf{x})$ , in L4 with slightly blurred edges (achieved by convolving contrast from a with a Gaussian kernel). **c)** Input,  $X_E(\mathbf{x})$ , from L4 to excitatory neurons in L2/3 is blurred by synaptic divergence, which effectively applies a low-pass filter,  $\mathcal{W}_X$ , to the L4 rates. **c)** Excitatory firing rates in L2/3 are sharper than external input when lateral excitation is similar, but smaller, in width than interlaminar excitation ( $\alpha_E = 0.85\alpha_X$ ). **d-f)** Same as **c)**, but lateral excitation is exactly as broad as interlaminar excitation ( $\alpha_E = \alpha_X$ ), which sharpens the edges further, making firing rates in L2/3 similar to those in L4. **d)** Same as **c)**, but lateral excitation is broader than interlaminar excitation ( $\alpha_E = 1.1\alpha_X$ ), which sharpens the edges even further, but also introduced suppressed regions due to Gibbs phenomena. **g-l)** Same as **a-f)**, but contrast was determined by the brightness of a photograph. Horizontal and vertical axes are neurons' receptive fields.

### 3 Discussion

We described a theory of imbalanced amplification in cortical circuits arising from a local imbalance that occurs when recurrent connectivity structure cannot cancel feedforward input. We showed that imbalanced amplification is evoked by optogenetic stimuli in somatosensory cortex and sensory stimuli in visual cortex, since these stimuli cannot be canceled by the connectivity structure in those areas. Our theoretical analysis of imbalanced amplification explains several observations from cortical recordings in those areas.

Even though firing rates in balanced networks in the large  $N$  limit do not depend on neurons' f-I curves (see Eq. (3)), quantifying firing rates under imbalanced amplification relies on a finite size correction that requires an assumption on how firing rates depend on neurons' input. For simplicity, we used an approximation that assumes populations' mean firing rates depend linearly on their average input currents, giving rise to Eqs. (4) and (17). In reality, neurons' firing rates depend nonlinearly on their mean input currents, and also depend on higher moments of their input currents. However, the salient effects of imbalanced amplification are not sensitive to our assumption of linearity. For instance, Eq. (5), which quantifies the strong synaptic currents evoked under imbalanced amplification, does not depend on any assumption about neurons' f-I curves. The precise value of the firing rates elicited by this strong input does depend on neurons' f-I curves, however. We found that the linear approximation to f-I curves in Eqs. (4) and (17) performed well at approximating firing rates in our spiking network simulations and also explained several observations from cortical recordings. This may be partly explained due to the fact that our spiking network simulations used neuron models that exhibit spike frequency adaptation, which is known to linearize f-I curves [18, 29] and help networks maintain balance [30]. However, the linear approximation we used cannot explain some phenomena that rely on thresholding and other nonlinear transfer properties [50, 38]. The notion of imbalanced amplification extends naturally to models with nonlinear transfer functions and future work will



619 consider the implications of nonlinearities.

620 Balanced networks are related to, but distinct from, inhibitory stabilized networks (ISNs) [41,  
621 50, 36] and stabilized supralinear networks that can transition between ISN and non-ISN  
622 regimes [50]. The primary distinction is that ISNs are defined by moderately strong recur-  
623 rent excitation (strong  $E \rightarrow E$ ) whereas balanced networks are defined by very strong external,  
624 feedforward excitation (strong  $X \rightarrow E$ ) canceled by similarly strong net-inhibitory recurrent  
625 connectivity. Classical balanced networks are necessarily inhibitory stabilized at sufficiently  
626 large  $N$  (small  $\epsilon$ ) unless  $w_{EE} = 0$ . However, strongly coupled (approximately balanced) net-  
627 works can be non-ISN at moderately large  $N$  (small  $\epsilon$ ) if  $w_{EE}$  is small. Cat V1 is believed to be  
628 inhibitory stabilized, which can be used to explain its surround suppression dynamic [41]. How-  
629 ever, evidence from optogenetic and electrophysiological studies, suggests that mouse L2/3 V1  
630 might not be inhibitory stabilized: Lateral connection probability is small between pyramidal  
631 neurons (small  $w_{EE}$ ) [24], stimulation of PV neurons does not produce the paradoxical effects  
632 that characterize ISNs [4], and modulating pyramidal neuron firing rates only weakly modulates  
633 excitatory synaptic currents in local pyramidal neurons [4, 1]. Nonetheless, pyramidal neurons  
634 and PV neurons in mouse V1 exhibit surround suppression [1], which we showed is explained  
635 by imbalanced amplification.

636 Despite the similarity in their names, the mechanism of imbalanced amplification studied here  
637 is fundamentally different from the mechanism of balanced amplification [39]. First, imbalanced  
638 amplification is related to steady-state firing rates, while balanced amplification is a dynamical  
639 phenomenon. Moreover, balanced amplification is intrinsic to the local, recurrent circuit: It  
640 produces large firing rate transients when local, recurrent inhibition is inefficient at canceling  
641 local, recurrent excitation. Imbalanced amplification, on the other hand, produces large steady  
642 state firing rates when local, recurrent input is unable to effectively cancel feedforward, external  
643 excitation.

644 The analysis of our spatially extended network model relied on an assumption of periodic  
645 boundaries in space, which are not biologically realistic, but approximate networks with more  
646 realistic boundary conditions [48]. Without periodic boundary conditions, the integral equations,  
647 (10), (11), and (16) are equally valid, but the integrals are defined by regular convolutions in  
648 space instead of circular convolutions. As a result, the spatial Fourier modes do not de-couple, so  
649 Eqs. (12), (13), and (17) are no longer valid, though they should still offer a good approximation  
650 when connectivity is much narrower than the the spatial domain [48]. In addition, anisotropic  
651 connectivity statistics, arising for example from tuning dependent connectivity in visual cortical  
652 circuits with coherent orientation maps [6], would prevent the integral operator in Eqs. (10),  
653 (11), and (16) from being a convolution operator, and therefore preclude the use of Fourier  
654 series for the solution. Future work will consider the effects of non-periodic boundaries and  
655 non-convolutional connectivity kernels on spatially extended balanced networks.

656 We focused on firing rates, but sensory coding also depends on variability and correlations  
657 in neurons' spike trains. Our previous work derived the structure of correlated variability in  
658 heterogeneous and spatially extended balanced networks when connectivity structure prevents  
659 positive and negative correlations from cancelling, effectively providing an analogous theory of  
660 imbalanced amplification of correlated variability [49]. Combining those findings with the theory  
661 of steady-state firing rates presented here could yield a more complete theory of neural coding  
662 in cortical circuits and the effects of imbalanced amplification on coding.

## 663 Acknowledgments

664 This work was supported by National Science Foundation grants DMS-1517828, DMS-1654268,  
665 and DBI-1707400. We thank Ashok Litwin-Kumar for helpful comments on a draft of the  
666 manuscript.



## Methods

667

668

669

670

671

672

We modeled recurrently connected networks with  $N$  neurons, composed of  $N_E = 0.8N$  excitatory and  $N_I = 0.2N$  inhibitory neurons. The recurrent network receives external input from a network of  $N_X$  neurons that drive the recurrent network. The membrane potential of neuron  $j$  from the excitatory ( $a = E$ ) or inhibitory ( $a = I$ ) population has Adaptive Exponential integrate-and-fire dynamics,

$$C_m \frac{dV_j^a}{dt} = -g_L(V - E_L) + g_L \Delta_T \exp[(V - V_T)/\Delta_T] + I_j^a(t) - w$$

$$\tau_w \frac{dw}{dt} = -w.$$

673

674

675

676

677

Whenever  $V_j^a(t) > V_{th}$ , a spike is recorded, the membrane potential is held for a refractory period  $\tau_{ref}$  then reset to a fixed value  $V_{re}$ , and  $w$  is incremented by  $B$ . Neuron model parameters for all simulations were  $\tau_m = C_m/g_L = 15\text{ms}$ ,  $E_L = -72\text{mV}$ ,  $V_T = -60\text{mV}$ ,  $V_{th} = -15\text{mV}$ ,  $\Delta_T = 1.5\text{mV}$ ,  $V_{re} = -72\text{mV}$ ,  $\tau_{ref} = 1\text{ms}$ ,  $\tau_w = 150\text{ms}$  and  $B/C_m = 0.267\text{mV/ms}$ . Membrane potentials were also bounded below by  $V_{lb} = -100\text{mV}$ . Synaptic input currents were defined by

$$C_m^{-1} I_j^a(t) = X_j^a(t) + R_j^a(t) \quad (18)$$

678

679

where  $X_j^a(t)$  is the feedforward input and  $R_j^a(t)$  the recurrent input to neuron  $j$  in population  $a = E, I$ . The recurrent input was defined by

$$R_j^a(t) = \sum_{b=E,I} \sum_{k=1}^{N_b} J_{jk}^{ab} \sum_n \eta_b(t - t_n^{b,k})$$

680

681

where  $t_n^{b,k}$  is the  $n$ th spike time of neuron  $k$  in population  $b = E, I$ . The external input to the recurrent network is defined similarly by

$$X_j^a(t) = \sum_{k=1}^{N_X} J_{jk}^{aX} \sum_n \eta_X(t - t_n^{X,k}). \quad (19)$$

682

683

684

685

686

687

688

689

690

691

692

693

where  $t_n^{X,k}$  is the  $n$ th spike time of neuron  $k = 1, \dots, N_X$  in population  $X$ . Each coefficient,  $J_{jk}^{ab}$ , represents the synaptic weight from presynaptic neuron  $k$  in population  $b$  to postsynaptic neuron  $j$  in population  $a$ . For all simulations, we modeled synaptic kinetics using  $\eta_b(t) = \exp(-t/\tau_b)/\tau_b$  for  $t > 0$  where  $\tau_E = 8\text{ms}$ ,  $\tau_I = 4\text{ms}$ , and  $\tau_X = 10\text{ms}$ . Note that the integral of  $\eta_b(t)$  over time is equal to 1 for all three kernels, so the choice of time constant,  $\tau_b$ , does not effect time-averaged synaptic currents. We used  $\tau_I < \tau_E < \tau_X$  to prevent excessive synchronous events that break the balanced state. While inhibition may be faster than excitation in many cortical circuits, excitatory neurons are more likely to contact distal dendrites and inhibitory neurons are more likely to contact the soma [27, 22], which could make inhibition functionally faster than excitation. In any case, using fast inhibition is common practice in spiking network simulations with strong or dense connectivity [47, 35, 50, 49, 54] and a complete resolution of this issue is outside the scope of this study.

694

695

696

697

698

699

In Figs. 1, 2 and 3 an extra term,  $S = 2 \text{ mV/ms}$ , was added to  $X_j^E(t)$  for stimulated neurons during the second half of the simulation to model optogenetic stimulation. We used  $N_E = 4000$ ,  $N_I = 1000$  and  $N_X = 4000$  (so  $N = 5000$ ) except for Fig. 1f where all  $N_b$  values were scaled. Connections were drawn randomly with connection probabilities  $p_{EE} = p_{IE} = p_{IX} = 0.1$ ,  $p_{EI} = p_{II} = p_{EX} = 0.2$ . Since outgoing connections were sampled with replacement, some neurons connected multiple times to other neurons. Synaptic weights were then defined by

$$J_{jk}^{ab} = (\# \text{ of contacts}) \times J_{ab}$$

700 where  $J_{EE} = 0.4\text{mV}$ ,  $J_{IE} = 0.83\text{ mV}$ ,  $J_{II} = J_{EI} = -1.67\text{ mV}$ ,  $J_{EX} = J_{IX} = 0.47\text{ mV}$ .  
 701 This gives postsynaptic potential amplitudes between 0.19 and 1.0 mV. For Figs. 1f and 4,  
 702 the values of  $J_{ab}$  and the values of  $p_{ab}$  were each multiplied by  $(5000/N)^{1/4}$  so that they were  
 703 unchanged at  $N = 5000$  and so that  $\epsilon \sim 1/\sqrt{N}$ . This is slightly different from the more common  
 704 practice of fixing small connection probabilities and scaling  $J_{ab}$  like  $1/\sqrt{N}$ . We instead fixed  
 705 a relatively dense connectivity at  $N = 5000$  and the network became increasingly sparse and  
 706 weakly connected at increased  $N$ . Both approaches have the same mean-field (since the mean-  
 707 field only depends on the product of  $p_{ab}$  and  $J_{ab}$ ), but our approach prevents excessively small  
 708 synaptic weights at large  $N$  and prevents dense connectivity at large  $N$ , which is computationally  
 709 expensive and susceptible to oscillatory and synchronous spiking.

710 Spike times in the external population were modeled as independent Poisson processes with  
 711  $r_X = 5\text{ Hz}$ . In Fig. 3, external input to the L5 population was created using the spike times of  
 712 excitatory neurons from the simulations in Fig. 2. Simulations for Fig. 4 were identical to those  
 713 in Figs. 2 and 3 except there were  $N = 2 \times 10^4$  neurons in the L2/3 model, synaptic weights  
 714 to neurons in that population were multiplied by  $1/\sqrt{2}$ , and connections probabilities were also  
 715 multiplied by  $1/\sqrt{2}$ . Hence, in relation to Fig. 2,  $N$  was increased by a factor of four and  $\epsilon$  was  
 716 halved.

717 Simulations for Figure 5 used algorithms adapted from previous work [49]. The recurrent  
 718 network (L2/3) contained  $N = 2 \times 10^5$  AdEx model neurons,  $N_E = 1.6 \times 10^5$  of which were ex-  
 719 citatory and  $N_I = 4 \times 10^4$  inhibitory. Excitatory and inhibitory neurons in L2/3 were arranged  
 720 on a uniform grid covering the unit square  $[0, 1] \times [0, 1]$  (arbitrary spatial units). The external  
 721 population (L4) contained  $N_X = 1.6 \times 10^5$  neurons arranged on an identical, parallel square.  
 722 Each neuron in each population was assigned a preferred orientation chosen randomly and uni-  
 723 formly from 0 to  $180^\circ$ . Connections were chosen randomly as above, but connection probabilities  
 724 depended on the neurons' distances in physical and orientation tuning space. Specifically, the  
 725 connection probability from a neuron in population  $b = E, I, X$  at coordinates  $\mathbf{x} = (x_1, x_2)$  to  
 726 a neuron in population  $a = E, I$  at coordinates  $\mathbf{y} = (y_1, y_2)$  was

$$p_{ab}(\mathbf{x} - \mathbf{y}, d\theta) = \bar{p}_{ab} G(\mathbf{x} - \mathbf{y}; \alpha_b) g(d\theta/180^\circ; \alpha_{b,\theta})$$

727 where  $d\theta$  is the difference between neurons' preferred orientation,

$$g(u; \alpha) = \frac{1}{\sqrt{2\pi}\alpha} \sum_{k=-\infty}^{\infty} e^{-u^2/(2\alpha^2)}$$

728 is a one-dimensional wrapped Gaussian and  $G(\mathbf{u}; \alpha) = g(u_1; \alpha)g(u_2; \alpha)$  is a two dimensional  
 729 wrapped Gaussian. The connection probability averaged over all distances is  $\bar{p}_{ab}$ , which were  
 730 chosen to be the same as in previous figures,  $\bar{p}_{EE} = \bar{p}_{IE} = \bar{p}_{IX} = 0.1$  and  $\bar{p}_{EI} = \bar{p}_{II} = \bar{p}_{EX} =$   
 731  $0.2$ . As above, outgoing connections were chosen with replacement, so some neurons made  
 732 multiple contacts onto other neurons. Connection widths in physical space were  $\alpha_E = 0.15$  and  
 733  $\alpha_I = \alpha_X = 0.04$  (as measured on the unit square). Connection widths in orientation space were  
 734  $\alpha_{E,\theta} = \alpha_{E,\theta} = 0.1$  and  $\alpha_{X,\theta} = 0.125$  (corresponding to widths of  $18^\circ$  and  $22.5^\circ$  when measured  
 735 in degrees). Connection strengths,  $J_{ab}$ , were the same as in Figs. 1, 2 and 3 except multiplied  
 736 by a factor of 1.2. Each neuron in L4 was modeled as a Poisson process with rate given by

$$r_X(\mathbf{x}, \theta) = r_{X,x}(\mathbf{x})r_{X,\theta}(\theta)$$

737 where  $\mathbf{x}$  is the location of the neuron,  $\theta$  is its preferred orientation,

$$r_{X,x}(\mathbf{x}) = c + (1 - c)G(\mathbf{x} - \mathbf{x}_0; \sigma_X)$$

738 and

$$r_{X,\theta}(\theta) = c_\theta + (1 - c_\theta)g([\theta - \theta_0]/180^\circ; \sigma_{X,\theta}).$$

739 This models a stimulus with orientation  $\theta_0 = 0.5$  (representing  $90^\circ$ ) and centered at spatial  
 740 coordinates  $\mathbf{x}_0 = (0.5, 0.5)$ . The parameters  $\sigma_X$  and  $\sigma_{X,\theta}$  quantify the width of L4 firing rates  
 741 in physical and orientation space. For all panels in Fig. 5, we used  $\sigma_{X,\theta} = 0.1$  (width  $18^\circ$ ) and  
 742  $c_\theta = 0.75$ . We used  $\sigma_X = 0.2$  for Fig. 5d-i and  $\sigma_X = 0.06$  for Fig. 5j-o. In both cases, we chose  
 743  $c$  so that the minimum and maximum of  $r_{X,x}(\mathbf{x})$  were 10 and 20 Hz respectively.

744 For the spatially extended network, the connectivity kernels,  $\mathcal{W}$  and  $\mathcal{W}_X$ , are defined in  
 745 Results where  $w_{ab}(\mathbf{x}, \theta) = J_{ab}N_b p_{ab}(\mathbf{x}, \theta)/(J_{EXP}EX N_X)$ . The Fourier series in physical and  
 746 orientation tuning space is defined by

$$\tilde{\mathbf{u}}(\mathbf{n}, k) = \iiint \mathbf{u}(\mathbf{x}, \theta) e^{-2\pi i(\mathbf{x}\cdot\mathbf{n} + k\theta)} d\mathbf{x} d\theta$$

747 where the triple integral is over the two dimensions of physical space and one dimensional  
 748 orientation space. The Fourier series of the convolution kernels defined above turns convolution  
 749 into multiplication in the Fourier domain, from which Eq. (10) gives  $\tilde{\mathbf{I}} = (1/\epsilon)[\tilde{W}\tilde{\mathbf{r}} + \tilde{\mathbf{X}}]$  where  $\tilde{\mathbf{X}}$ ,  
 750  $\tilde{W}$ , and  $\tilde{W}_X$  are defined in Results with  $\tilde{w}_{ab}(\mathbf{n}, k) = \bar{w}_{ab} \exp[-2\pi^2(|\mathbf{n}|^2\alpha_b^2 + k^2\alpha_{b,\theta}^2)]$ ,  $\bar{w}_{ab} =$   
 751  $\tilde{w}_{ab}(\mathbf{0}, 0) = J_{ab}p_{ab}N_b/(J_{EXP}EX N_X)$ , and  $\|\mathbf{n}\|^2 = n_1^2 + n_2^2$ . Using the linear approximation,  
 752  $\mathbf{r} = g\mathbf{I}$  then gives Eq. (17). Firing rates for dashed curves in Fig. 5 and all firing rates in  
 753 Figs. 6 and 7 were obtained by first computing Eq. (17), then inverting the Fourier transform  
 754 numerically using an inverse fast Fourier transform. Solid curves in Fig. 5 were computed  
 755 similarly, except using Eq. (13) in place of Eq. (17).

756 All simulations and numerical computations were performed on a MacBook Pro running OS  
 757 X 10.9.5 with a 2.3 GHz Intel Core i7 processor. All simulations were written in a combination  
 758 of C and Matlab (Matlab R 2015b, MathWorks). The differential equations defining the neuron  
 759 model were solved using a forward Euler method with time step 0.1 ms.

## 760 References

- 761 [1] H Adesnik, W Bruns, H Taniguchi, Z J Huang, and M Scanziani. A neural circuit for  
 762 spatial summation in visual cortex. *Nature*, 490(7419):226–31, oct 2012.
- 763 [2] H Adesnik and M Scanziani. Lateral competition for cortical space by layer-specific hori-  
 764 zontal circuits. *Nature*, 464(7292):1155–60, apr 2010.
- 765 [3] DJ Amit and N Brunel. Model of global spontaneous activity and local structured activity  
 766 during delay periods in the cerebral cortex. *Cereb Cortex*, 7(3):237–252, 1997.
- 767 [4] BV Atallah, W Bruns, M Carandini, and M Scanziani. Parvalbumin-Expressing Interneu-  
 768 rons Linearly Transform Cortical Responses to Visual Stimuli. *Neuron*, 73(1):159–170,  
 769 2012.
- 770 [5] R Ben-Yishai, R L Bar-Or, and H Sompolinsky. Theory of orientation tuning in visual  
 771 cortex. *Proc Natl Acad Sci USA*, 92(9):3844–3848, 1995.
- 772 [6] W H Bosking, Y Zhang, B Schofield, and D Fitzpatrick. Orientation selectivity and the  
 773 arrangement of horizontal connections in tree shrew striate cortex. *J Neurosci*, 17(6):2112–  
 774 27, 1997.
- 775 [7] E S Boyden, F Zhang, E Bamberg, G Nagel, and K Deisseroth. Millisecond-timescale,  
 776 genetically targeted optical control of neural activity. *Nature Neurosci*, 8(9):1263–1268,  
 777 2005.
- 778 [8] R Brette and W Gerstner. Adaptive exponential integrate-and-fire model as an effective  
 779 description of neuronal activity. *J Neurophysiol*, 94(5):3637–3642, 2005.
- 780 [9] N Brunel and V Hakim. Fast global oscillations in networks of integrate-and-fire neurons  
 781 with low firing rates. *Neural Comput*, 11(7):1621–1671, 1999.

- 782 [10] B Chambers and J N MacLean. Higher-order synaptic interactions coordinate dynamics in  
783 recurrent networks. *PLoS Comput Biol*, 12(8):e1005078, 2016.
- 784 [11] M R Cohen and A Kohn. Measuring and interpreting neuronal correlations. *Nature Neu-*  
785 *rosci*, 14(7):811–819, 2011.
- 786 [12] K Cohen-Kashi Malina, M Jubran, Y Katz, and I Lampl. Imbalance between excitation and  
787 inhibition in the somatosensory cortex produces postadaptation facilitation. *J Neurosci*,  
788 33(19):8463–8471, May 2013.
- 789 [13] P Dayan and L F Abbott. *Theoretical Neuroscience*. Cambridge, MA: MIT Press, 2001.
- 790 [14] Nima Dehghani, Adrien Peyrache, Bartosz Telenczuk, Michel Le Van Quyen, Eric Hal-  
791 gren, Sydney S Cash, Nicholas G Hatsopoulos, and Alain Destexhe. Dynamic balance of  
792 excitation and inhibition in human and monkey neocortex. *Sci Rep*, 6, 2016.
- 793 [15] K Deisseroth. Optogenetics: 10 years of microbial opsins in neuroscience. *Nature Neurosci*,  
794 18(9):1213–1225, 2015.
- 795 [16] B Doiron, A Litwin-Kumar, R Rosenbaum, G K Ocker, and K Josić. The mechanics of  
796 state-dependent neural correlations. *Nature Neurosci*, 19(3):383–393, 2016.
- 797 [17] AS Ecker, P Berens, GA Keliris, M Bethge, NK Logothetis, and AS Tolias. Decorrelated  
798 Neuronal Firing in Cortical Microcircuits. *Science*, 327(5965):584–587, 2010.
- 799 [18] B Ermentrout. Linearization of F-I curves by adaptation. *Neural Comput*, 10(7):1721–1729,  
800 1998.
- 801 [19] G L Gerstein and B Mandelbrot. Random Walk Models for the Spike Activity of a Single  
802 Neuron. *Biophys J*, 4(c):41–68, jan 1964.
- 803 [20] Bilal Haider, Alvaro Duque, Andrea R Hasenstaub, and David A McCormick. Neocortical  
804 network activity in vivo is generated through a dynamic balance of excitation and inhibition.  
805 *J Neurosci*, 26(17):4535–4545, 2006.
- 806 [21] L Hertäg, D Durstewitz, and N Brunel. Analytical approximations of the firing rate of an  
807 adaptive exponential integrate-and-fire neuron in the presence of synaptic noise. *Frontiers*  
808 *in Comput Neurosci*, 8, 2014.
- 809 [22] H Hioki, S Okamoto, M Konno, H Kameda, J Sohn, E Kuramoto, F Fujiyama, and  
810 T Kaneko. Cell type-specific inhibitory inputs to dendritic and somatic compartments  
811 of parvalbumin-expressing neocortical interneuron. *J Neurosci*, 33(2):544–555, 2013.
- 812 [23] S B Hofer, H Ko, B Pichler, J Vogelstein, H Ros, H Zeng, E Lein, N A Lesica, and T D  
813 Mrsic-Flogel. Differential connectivity and response dynamics of excitatory and inhibitory  
814 neurons in visual cortex. *Nature Neurosci*, 14(8):1045–52, aug 2011.
- 815 [24] X Jiang, S Shen, C R Cadwell, P Berens, F Sinz, A S Ecker, S Patel, and A S Tolias.  
816 Principles of connectivity among morphologically defined cell types in adult neocortex.  
817 *Science*, 350(6264):aac9462, 2015.
- 818 [25] R Jolivet, A Rauch, H R Lüscher, and W Gerstner. Integrate-and-Fire models with adap-  
819 tation are good enough: predicting spike times under random current injection. *Adv Neural*  
820 *Inf Process Syst*, 18:595–602, 2006.
- 821 [26] R Jolivet, F Schürmann, T K Berger, R Naud, W Gerstner, and A Roth. The quantitative  
822 single-neuron modeling competition. *Biol Cybern*, 99(4-5):417–426, 2008.
- 823 [27] H Kameda, H Hioki, Y H Tanaka, T Tanaka, J Sohn, T Sonomura, T Furuta, F Fujiyama,  
824 and T Kaneko. Parvalbumin-producing cortical interneurons receive inhibitory inputs on  
825 proximal portions and cortical excitatory inputs on distal dendrites. *Europ J Neurosci*,  
826 35(6):838–854, 2012.

- 827 [28] H Ko, S B Hofer, B Pichler, K A Buchanan, P J Sjöström, and T D Mrsic-Flogel. Functional  
828 specificity of local synaptic connections in neocortical networks. *Nature*, 473(7345):87–91,  
829 May 2011.
- 830 [29] G Koch Ocker and B Doiron. Kv7 channels regulate pairwise spiking covariability in health  
831 and disease. *J Neurophysiol*, 112(2):340–352, 2014.
- 832 [30] I D Landau, R Egger, V J Dercksen, M Oberlaender, and H Sompolinsky. The impact  
833 of structural heterogeneity on excitation-inhibition balance in cortical networks. *Neuron*,  
834 2016.
- 835 [31] Y LeCun, Y Bengio, and G Hinton. Deep learning. *Nature*, 521(7553):436–444, 2015.
- 836 [32] E Ledoux and N Brunel. Dynamics of networks of excitatory and inhibitory neurons in  
837 response to time-dependent inputs. *Front Comput Neurosci*, 5:25, 2011.
- 838 [33] Robert B Levy and Alex D Reyes. Spatial profile of excitatory and inhibitory synaptic  
839 connectivity in mouse primary auditory cortex. *J Neurosci*, 32(16):5609–5619, 2012.
- 840 [34] S Lim and M S Goldman. Balanced cortical microcircuitry for spatial working memory  
841 based on corrective feedback control. *J Neurosci*, 34(20):6790–6806, 2014.
- 842 [35] A Litwin-Kumar and B Doiron. Slow dynamics and high variability in balanced cortical  
843 networks with clustered connections. *Nature Neurosci*, 15(11):1498–1505, 2012.
- 844 [36] A Litwin-Kumar, R Rosenbaum, and B Doiron. Inhibitory stabilization and visual coding  
845 in cortical circuits with multiple interneuron subtypes. *J Neurophysiol*, 115(3):1399–1409,  
846 2016.
- 847 [37] B J Marlin, M Mitre, J A D’amour, M V Chao, and R C Froemke. Oxytocin enables  
848 maternal behaviour by balancing cortical inhibition. *Nature*, 520(7548):499–504, 2015.
- 849 [38] K D Miller. Canonical computations of cerebral cortex. *Curr Opin Neurobiol*, 37:75–84,  
850 2016.
- 851 [39] B K Murphy and K D Miller. Balanced amplification: a new mechanism of selective  
852 amplification of neural activity patterns. *Neuron*, 61(4):635–48, 2009.
- 853 [40] M Okun and I Lampl. Instantaneous correlation of excitation and inhibition during ongoing  
854 and sensory-evoked activities. *Nature Neurosci*, 11(5):535–537, 2008.
- 855 [41] H Ozeki, I M Finn, E S Schaffer, K D Miller, and D Ferster. Inhibitory stabilization of the  
856 cortical network underlies visual surround suppression. *Neuron*, 62(4):578–92, 2009.
- 857 [42] L Petreanu, D Huber, A Sobczyk, and K Svoboda. Channelrhodopsin-2-assisted circuit  
858 mapping of long-range callosal projections. *Nature Neurosci*, 10(5):663–668, 2007.
- 859 [43] EAK Phillips and AR Hasenstaub. Asymmetric effects of activating and inactivating cor-  
860 tical interneurons. *eLife*, 5:e18383, 2016.
- 861 [44] F Pouille, A Marin-Burgin, H Adesnik, B V Atallah, and M Scanziani. Input normaliza-  
862 tion by global feedforward inhibition expands cortical dynamic range. *Nature Neurosci*,  
863 12(12):1577–1585, 2009.
- 864 [45] R Pyle and R Rosenbaum. Highly connected neurons spike less frequently in balanced  
865 networks. *Phys Rev E*, 93(4):040302, 2016.
- 866 [46] A Renart, N Brunel, and X-J Wang. Mean-field theory of irregularly spiking neuronal  
867 populations and working memory in recurrent cortical networks. In *Computational Neuro-  
868 science: A Comprehensive Approach*, pages 431–490. CRC Press, New York, 2004.
- 869 [47] A Renart, J de La Rocha, P Bartho, L Hollender, N Parga, A Reyes, and KD Harris. The  
870 Asynchronous State in Cortical Circuits. *Science*, 327(5965):587–590, 2010.

- 871 [48] R Rosenbaum and B Doiron. Balanced networks of spiking neurons with spatially dependent  
872 recurrent connections. *Phys Rev X*, 4(2):021039, 2014.
- 873 [49] R Rosenbaum, M A Smith, A Kohn, J E Rubin, and B Doiron. The spatial structure of  
874 correlated neuronal variability. *Nature Neurosci*, 2016.
- 875 [50] D B Rubin, S D Van Hooser, and K D Miller. The stabilized supralinear network : A  
876 unifying circuit motif underlying multi-input integration in sensory cortex. *Neuron*, 85(2):1–  
877 51, 2015.
- 878 [51] M N Shadlen and W T Newsome. The variable discharge of cortical neurons: implications  
879 for connectivity, computation, and information coding. *J. Neurosci.*, 18(10):3870–96, may  
880 1998.
- 881 [52] M N Shadlen and W T Newsome. The variable discharge of cortical neurons: implications  
882 for connectivity, computation, and information coding. *J Neurosci*, 18(10):3870–3896, 1998.
- 883 [53] W R Softky and C Koch. The highly irregular firing of cortical cells is inconsistent with  
884 temporal integration of random EPSPs. *J Neurosci*, 13(1):334–50, 1993.
- 885 [54] C Stringer, M Pachitariu, N A Steinmetz, M Okun, P Bartho, K D Harris, M Sahani, and  
886 Nicholas A Lesica. Inhibitory control of correlated intrinsic variability in cortical networks.  
887 *eLife*, 5:e19695, 2016.
- 888 [55] AYY Tan, Y Chen, B Scholl, E Seidemann, and N J Priebe. Sensory stimulation shifts  
889 visual cortex from synchronous to asynchronous states. *Nature*, 509(7499):226, 2014.
- 890 [56] F G Tricomi. *Integral equations*. Interscience, New York, 1957.
- 891 [57] MV Tsodyks, WE Skaggs, TJ Sejnowski, and BL Mcnaughton. Paradoxical Effects of  
892 External Modulation of Inhibitory Interneurons. *J Neurosci*, 17(11):4382–4388, 1997.
- 893 [58] C van Vreeswijk and H Sompolinsky. Chaos in neuronal networks with balanced excitatory  
894 and inhibitory activity. *Science*, 274(5293):1724–1726, 1996.
- 895 [59] C van Vreeswijk and H Sompolinsky. Chaotic balanced state in a model of cortical circuits.  
896 *Neural Comput*, 10(6):1321–1371, 1998.
- 897 [60] K Wimmer, A Compte, A Roxin, D Peixoto, A Renart, and J de la Rocha. The dynamics  
898 of sensory integration in a hierarchical network explains choice probabilities in MT. *Nature*  
899 *Commun*, 6:1–13, 2015.
